# Supplementary material for: A specific, non-immune system-related isoform of the human inducible nitric oxide synthase is expressed during differentiation of human stem cells into various cell types
Source: PubMed Central journal article supplement (PMC8991583; doi:10.1186/s12964-022-00855-x), 2022-04-07
Supplement: 12964_2022_855_MOESM2_ESM.pdf [file 12964_2022_855_MOESM2_ESM.pdf]

## Supplemental tables

| TF title | START<br>(Ch17) | END<br>(Ch17) | Start<br>(G) | End<br>(G) | Gene stable ID  | Gene description                                                                                                                    |
|----------|-----------------|---------------|--------------|------------|-----------------|-------------------------------------------------------------------------------------------------------------------------------------|
| SMARCC1  | 27798640        | 27798684      | 1845         | 1889       | ENSG00000173473 | SWI/SNF related, matrix associated, actin dependent regulator of chromatin subfamily c member 1 [Source:HGNC Symbol;Acc:HGNC:11104] |
| ZBTB17   | 27798586        | 27798645      | 1884         | 1943       | ENSG00000116809 | zinc finger and BTB domain containing 17 [Source:HGNC Symbol;Acc:HGNC:12936]                                                        |
| KMT2B    | 27798586        | 27798693      | 1836         | 1943       | ENSG00000272333 | lysine methyltransferase 2B [Source:HGNC Symbol;Acc:HGNC:15840]                                                                     |
| JUN      | 27798582        | 27798659      | 1870         | 1947       | ENSG00000177606 | Jun proto-oncogene, AP-1 transcription factor subunit [Source:HGNC Symbol;Acc:HGNC:6204]                                            |
| NCOA1    | 27798580        | 27798665      | 1864         | 1949       | ENSG00000084676 | nuclear receptor coactivator 1 [Source:HGNC Symbol;Acc:HGNC:7668]                                                                   |
| TEAD1    | 27798556        | 27798608      | 1921         | 1973       | ENSG00000187079 | TEA domain transcription factor 1 [Source:HGNC Symbol;Acc:HGNC:11714]                                                               |
| TP53     | 27798538        | 27798629      | 1900         | 1991       | ENSG00000141510 | tumor protein p53 [Source:HGNC Symbol;Acc:HGNC:11998]                                                                               |

|         |          |          |      |      |                 |                                                                                                 |
|---------|----------|----------|------|------|-----------------|-------------------------------------------------------------------------------------------------|
| CTCF    | 27798513 | 27798616 | 1913 | 2016 | ENSG00000102974 | CCCTC-binding factor<br>[Source:HGNC<br>Symbol;Acc:HGNC:13723]                                  |
| TEAD4   | 27798513 | 27798588 | 1941 | 2016 | ENSG00000197905 | TEA domain transcription<br>factor 4 [Source:HGNC<br>Symbol;Acc:HGNC:11717]                     |
| BRD4    | 27798460 | 27798567 | 1962 | 2069 | ENSG00000141867 | bromodomain containing 4<br>[Source:HGNC<br>Symbol;Acc:HGNC:13575]                              |
| SP140   | 27798367 | 27798460 | 2069 | 2162 | ENSG00000079263 | SP140 nuclear body<br>protein [Source:HGNC<br>Symbol;Acc:HGNC:17133]                            |
| ESR1    | 27798354 | 27798439 | 2090 | 2175 | ENSG00000091831 | estrogen receptor 1<br>[Source:HGNC<br>Symbol;Acc:HGNC:3467]                                    |
| TP63    | 27798278 | 27798371 | 2158 | 2251 | ENSG00000073282 | tumor protein p63<br>[Source:HGNC<br>Symbol;Acc:HGNC:15979]                                     |
| USF2    | 27798252 | 27798321 | 2208 | 2277 | ENSG00000105698 | upstream transcription<br>factor 2, c-fos interacting<br>[Source:HGNC<br>Symbol;Acc:HGNC:12594] |
| BHLHE40 | 27798221 | 27798276 | 2253 | 2308 | ENSG00000134107 | basic helix-loop-helix<br>family member e40<br>[Source:HGNC<br>Symbol;Acc:HGNC:1046]            |
| BRD4    | 27798204 | 27798311 | 2218 | 2325 | ENSG00000141867 | bromodomain containing 4<br>[Source:HGNC<br>Symbol;Acc:HGNC:13575]                              |
| MYC     | 27798192 | 27798281 | 2248 | 2337 | ENSG00000136997 | MYC proto-oncogene,<br>bHLH transcription factor                                                |

|       |          |          |      |      |                 |                                                                                                 |
|-------|----------|----------|------|------|-----------------|-------------------------------------------------------------------------------------------------|
|       |          |          |      |      |                 | [Source:HGNC<br>Symbol;Acc:HGNC:7553]                                                           |
| STAT1 | 27798168 | 27798225 | 2304 | 2361 | ENSG00000115415 | signal transducer and<br>activator of transcription 1<br>[Source:HGNC<br>Symbol;Acc:HGNC:11362] |
| TFAP4 | 27798143 | 27798222 | 2307 | 2386 | ENSG00000090447 | transcription factor AP-4<br>[Source:HGNC<br>Symbol;Acc:HGNC:11745]                             |
| ETS1  | 27798139 | 27798154 | 2375 | 2390 | ENSG00000134954 | ETS proto-oncogene 1,<br>transcription factor<br>[Source:HGNC<br>Symbol;Acc:HGNC:3488]          |
| TP53  | 27798136 | 27798247 | 2282 | 2393 | ENSG00000141510 | tumor protein p53<br>[Source:HGNC<br>Symbol;Acc:HGNC:11998]                                     |
| AR    | 27798115 | 27798220 | 2309 | 2414 | ENSG00000169083 | androgen receptor<br>[Source:HGNC<br>Symbol;Acc:HGNC:644]                                       |
| FOXA2 | 27798079 | 27798172 | 2357 | 2450 | ENSG00000125798 | forkhead box A2<br>[Source:HGNC<br>Symbol;Acc:HGNC:5022]                                        |
| ZNF83 | 27798074 | 27798173 | 2356 | 2455 | ENSG00000167766 | zinc finger protein 83<br>[Source:HGNC<br>Symbol;Acc:HGNC:13158]                                |
| STAT1 | 27798066 | 27798123 | 2406 | 2463 | ENSG00000115415 | signal transducer and<br>activator of transcription 1<br>[Source:HGNC<br>Symbol;Acc:HGNC:11362] |

|        |          |          |      |      |                 |                                                                                                  |
|--------|----------|----------|------|------|-----------------|--------------------------------------------------------------------------------------------------|
| AR     | 27798048 | 27798091 | 2438 | 2481 | ENSG00000169083 | androgen receptor<br>[Source:HGNC<br>Symbol;Acc:HGNC:644]                                        |
| ESR1   | 27798042 | 27798084 | 2445 | 2487 | ENSG00000091831 | estrogen receptor 1<br>[Source:HGNC<br>Symbol;Acc:HGNC:3467]                                     |
| NFE2   | 27798042 | 27798057 | 2472 | 2487 | ENSG00000123405 | nuclear factor, erythroid 2<br>[Source:HGNC<br>Symbol;Acc:HGNC:7780]                             |
| PPARG  | 27798042 | 27798141 | 2388 | 2487 | ENSG00000132170 | peroxisome proliferator<br>activated receptor gamma<br>[Source:HGNC<br>Symbol;Acc:HGNC:9236]     |
| STAT5A | 27798036 | 27798115 | 2414 | 2493 | ENSG00000126561 | signal transducer and<br>activator of transcription<br>5A [Source:HGNC<br>Symbol;Acc:HGNC:11366] |
| FOXP1  | 27798020 | 27798101 | 2428 | 2509 | ENSG00000114861 | forkhead box P1<br>[Source:HGNC<br>Symbol;Acc:HGNC:3823]                                         |
| FOXA1  | 27797997 | 27798100 | 2429 | 2532 | ENSG00000129514 | forkhead box A1<br>[Source:HGNC<br>Symbol;Acc:HGNC:5021]                                         |
| CRY1   | 27797990 | 27798091 | 2438 | 2539 | ENSG00000008405 | cryptochrome circadian<br>regulator 1 [Source:HGNC<br>Symbol;Acc:HGNC:2384]                      |
| BRD4   | 27797988 | 27798095 | 2434 | 2541 | ENSG00000141867 | bromodomain containing 4<br>[Source:HGNC<br>Symbol;Acc:HGNC:13575]                               |

|             |          |          |      |      |                 |                                                                                       |
|-------------|----------|----------|------|------|-----------------|---------------------------------------------------------------------------------------|
| PGR         | 27797973 | 27798070 | 2459 | 2556 | ENSG00000082175 | progesterone receptor<br>[Source:HGNC<br>Symbol;Acc:HGNC:8910]                        |
| FXR2        | 27797959 | 27797984 | 2545 | 2570 | ENSG00000129245 | FMR1 autosomal homolog<br>2 [Source:HGNC<br>Symbol;Acc:HGNC:4024]                     |
| INTS11      | 27797957 | 27798044 | 2485 | 2572 | ENSG00000127054 | integrator complex subunit<br>11 [Source:HGNC<br>Symbol;Acc:HGNC:26052]               |
| HNF4A       | 27797951 | 27798033 | 2496 | 2578 | ENSG00000101076 | hepatocyte nuclear factor<br>4 alpha [Source:HGNC<br>Symbol;Acc:HGNC:5024]            |
| PDX1        | 27797949 | 27798012 | 2517 | 2580 | ENSG00000139515 | pancreatic and duodenal<br>homeobox 1<br>[Source:HGNC<br>Symbol;Acc:HGNC:6107]        |
| TCF7L2/LEF1 | 27797947 | 27797985 | 2544 | 2582 | ENSG00000148737 | transcription factor 7 like 2<br>[Source:HGNC<br>Symbol;Acc:HGNC:11641]               |
| GATA4       | 27797942 | 27797975 | 2554 | 2587 | ENSG00000285109 | GATA binding protein 4<br>[Source:HGNC<br>Symbol;Acc:HGNC:4173]                       |
| TCF7/LEF1   | 27797937 | 27797992 | 2537 | 2592 | ENSG00000081059 | transcription factor 7<br>[Source:HGNC<br>Symbol;Acc:HGNC:11639]                      |
| TRPS1       | 27797934 | 27798025 | 2504 | 2595 | ENSG00000104447 | transcriptional repressor<br>GATA binding 1<br>[Source:HGNC<br>Symbol;Acc:HGNC:12340] |

|         |          |          |      |      |                 |                                                                                            |
|---------|----------|----------|------|------|-----------------|--------------------------------------------------------------------------------------------|
| MEIS2   | 27797931 | 27797952 | 2577 | 2598 | ENSG00000134138 | Meis homeobox 2<br>[Source:HGNC<br>Symbol;Acc:HGNC:7001]                                   |
| ESR1    | 27797929 | 27798034 | 2495 | 2600 | ENSG00000091831 | estrogen receptor 1<br>[Source:HGNC<br>Symbol;Acc:HGNC:3467]                               |
| GATA6   | 27797926 | 27797964 | 2565 | 2603 | ENSG00000141448 | GATA binding protein 6<br>[Source:HGNC<br>Symbol;Acc:HGNC:4174]                            |
| NCOR2   | 27797925 | 27797992 | 2537 | 2604 | ENSG00000196498 | nuclear receptor<br>corepressor 2<br>[Source:HGNC<br>Symbol;Acc:HGNC:7673]                 |
| LHX9    | 27797923 | 27797970 | 2559 | 2606 | ENSG00000143355 | LIM homeobox 9<br>[Source:HGNC<br>Symbol;Acc:HGNC:14222]                                   |
| GATA2   | 27797922 | 27797999 | 2530 | 2607 | ENSG00000179348 | GATA binding protein 2<br>[Source:HGNC<br>Symbol;Acc:HGNC:4171]                            |
| CEBPB   | 27797920 | 27797953 | 2576 | 2609 | ENSG00000172216 | CCAAT enhancer binding<br>protein beta<br>[Source:HGNC<br>Symbol;Acc:HGNC:1834]            |
| FOSL1   | 27797919 | 27797974 | 2555 | 2610 | ENSG00000175592 | FOS like 1, AP-1<br>transcription factor subunit<br>[Source:HGNC<br>Symbol;Acc:HGNC:13718] |
| NEUROD1 | 27797918 | 27797945 | 2584 | 2611 | ENSG00000162992 | neuronal differentiation 1<br>[Source:HGNC<br>Symbol;Acc:HGNC:7762]                        |

|        |          |          |      |      |                 |                                                                                       |
|--------|----------|----------|------|------|-----------------|---------------------------------------------------------------------------------------|
| SMAD2  | 27797915 | 27797999 | 2530 | 2614 | ENSG00000175387 | SMAD family member 2<br>[Source:HGNC<br>Symbol;Acc:HGNC:6768]                         |
| CTCF   | 27797912 | 27797961 | 2568 | 2617 | ENSG00000102974 | CCCTC-binding factor<br>[Source:HGNC<br>Symbol;Acc:HGNC:13723]                        |
| HOXB13 | 27797909 | 27797988 | 2541 | 2620 | ENSG00000159184 | homeobox B13<br>[Source:HGNC<br>Symbol;Acc:HGNC:5112]                                 |
| OTX2   | 27797908 | 27797940 | 2589 | 2621 | ENSG00000165588 | orthodenticle homeobox 2<br>[Source:HGNC<br>Symbol;Acc:HGNC:8522]                     |
| ZBTB33 | 27797905 | 27797990 | 2539 | 2624 | ENSG00000177485 | zinc finger and BTB<br>domain containing 33<br>[Source:HGNC<br>Symbol;Acc:HGNC:16682] |
| TFAP4  | 27797904 | 27797969 | 2560 | 2625 | ENSG00000090447 | transcription factor AP-4<br>[Source:HGNC<br>Symbol;Acc:HGNC:11745]                   |
| GATA3  | 27797901 | 27797976 | 2553 | 2628 | ENSG00000107485 | GATA binding protein 3<br>[Source:HGNC<br>Symbol;Acc:HGNC:4172]                       |
| RCOR2  | 27797899 | 27797972 | 2557 | 2630 | ENSG00000167771 | REST corepressor 2<br>[Source:HGNC<br>Symbol;Acc:HGNC:27455]                          |
| SP7    | 27797895 | 27797926 | 2603 | 2634 | ENSG00000170374 | Sp7 transcription factor<br>[Source:HGNC<br>Symbol;Acc:HGNC:17321]                    |
| AR     | 27797893 | 27797947 | 2582 | 2636 | ENSG00000169083 | androgen receptor<br>[Source:HGNC<br>Symbol;Acc:HGNC:644]                             |

|         |          |          |      |      |                 |                                                                                                   |
|---------|----------|----------|------|------|-----------------|---------------------------------------------------------------------------------------------------|
| EP300   | 27797891 | 27797990 | 2539 | 2638 | ENSG00000100393 | E1A binding protein p300<br>[Source:HGNC<br>Symbol;Acc:HGNC:3373]                                 |
| PKNOX1  | 27797891 | 27797969 | 2560 | 2638 | ENSG00000160199 | PBX/knotted 1 homeobox<br>1 [Source:HGNC<br>Symbol;Acc:HGNC:9022]                                 |
| CDX2    | 27797890 | 27797913 | 2616 | 2639 | ENSG00000165556 | caudal type homeobox 2<br>[Source:HGNC<br>Symbol;Acc:HGNC:1806]                                   |
| GATAD2A | 27797888 | 27797981 | 2548 | 2641 | ENSG00000167491 | GATA zinc finger domain<br>containing 2A<br>[Source:HGNC<br>Symbol;Acc:HGNC:29989]                |
| PBX4    | 27797885 | 27797910 | 2619 | 2644 | ENSG00000105717 | PBX homeobox 4<br>[Source:HGNC<br>Symbol;Acc:HGNC:13403]                                          |
| MIXL1   | 27797884 | 27797943 | 2586 | 2645 | ENSG00000185155 | Mix paired-like homeobox<br>[Source:HGNC<br>Symbol;Acc:HGNC:13363]                                |
| JUN     | 27797883 | 27797928 | 2601 | 2646 | ENSG00000177606 | Jun proto-oncogene, AP-1<br>transcription factor subunit<br>[Source:HGNC<br>Symbol;Acc:HGNC:6204] |
| BRD4    | 27797882 | 27797991 | 2538 | 2647 | ENSG00000141867 | bromodomain containing 4<br>[Source:HGNC<br>Symbol;Acc:HGNC:13575]                                |
| BATF    | 27797880 | 27797931 | 2598 | 2649 | ENSG00000156127 | basic leucine zipper ATF-<br>like transcription factor<br>[Source:HGNC<br>Symbol;Acc:HGNC:958]    |



|         |          |          |      |      |                 |                                                                                               |
|---------|----------|----------|------|------|-----------------|-----------------------------------------------------------------------------------------------|
| TP53    | 27797875 | 27797944 | 2585 | 2654 | ENSG00000141510 | tumor protein p53<br>[Source:HGNC<br>Symbol;Acc:HGNC:11998]                                   |
| RELA    | 27797875 | 27797956 | 2573 | 2654 | ENSG00000173039 | RELA proto-oncogene,<br>NF-kB subunit<br>[Source:HGNC<br>Symbol;Acc:HGNC:9955]                |
| GRHL2   | 27797867 | 27797932 | 2597 | 2662 | ENSG00000083307 | grainyhead like<br>transcription factor 2<br>[Source:HGNC<br>Symbol;Acc:HGNC:2799]            |
| SLC30A9 | 27797862 | 27797963 | 2566 | 2667 | ENSG00000014824 | solute carrier family 30<br>member 9 [Source:HGNC<br>Symbol;Acc:HGNC:1329]                    |
| SAP130  | 27797859 | 27797960 | 2569 | 2670 | ENSG00000136715 | Sin3A associated protein<br>130 [Source:HGNC<br>Symbol;Acc:HGNC:29813]                        |
| NCOA1   | 27797858 | 27797923 | 2606 | 2671 | ENSG00000084676 | nuclear receptor<br>coactivator 1<br>[Source:HGNC<br>Symbol;Acc:HGNC:7668]                    |
| ZBTB17  | 27797856 | 27797937 | 2592 | 2673 | ENSG00000116809 | zinc finger and BTB<br>domain containing 17<br>[Source:HGNC<br>Symbol;Acc:HGNC:12936]         |
| SS18    | 27797854 | 27797947 | 2582 | 2675 | ENSG00000141380 | SS18 subunit of BAF<br>chromatin remodeling<br>complex [Source:HGNC<br>Symbol;Acc:HGNC:11340] |

|       |          |          |      |      |                 |                                                                                           |
|-------|----------|----------|------|------|-----------------|-------------------------------------------------------------------------------------------|
| ELF3  | 27797854 | 27797939 | 2590 | 2675 | ENSG00000163435 | E74 like ETS transcription factor 3 [Source:HGNC Symbol;Acc:HGNC:3318]                    |
| IRF1  | 27797852 | 27797931 | 2598 | 2677 | ENSG00000125347 | interferon regulatory factor 1 [Source:HGNC Symbol;Acc:HGNC:6116]                         |
| FOXA1 | 27797849 | 27797932 | 2597 | 2680 | ENSG00000129514 | forkhead box A1 [Source:HGNC Symbol;Acc:HGNC:5021]                                        |
| SMAD3 | 27797846 | 27797933 | 2596 | 2683 | ENSG00000166949 | SMAD family member 3 [Source:HGNC Symbol;Acc:HGNC:6769]                                   |
| FOXA2 | 27797831 | 27797918 | 2611 | 2698 | ENSG00000125798 | forkhead box A2 [Source:HGNC Symbol;Acc:HGNC:5022]                                        |
| JUND  | 27797830 | 27797891 | 2638 | 2699 | ENSG00000130522 | JunD proto-oncogene, AP-1 transcription factor subunit [Source:HGNC Symbol;Acc:HGNC:6206] |
| KMT2B | 27797823 | 27797922 | 2607 | 2706 | ENSG00000272333 | lysine methyltransferase 2B [Source:HGNC Symbol;Acc:HGNC:15840]                           |
| HNF4A | 27797821 | 27797908 | 2621 | 2708 | ENSG00000101076 | hepatocyte nuclear factor 4 alpha [Source:HGNC Symbol;Acc:HGNC:5024]                      |
| JUNB  | 27797819 | 27797902 | 2627 | 2710 | ENSG00000171223 | JunB proto-oncogene, AP-1 transcription factor subunit [Source:HGNC Symbol;Acc:HGNC:6205] |

|         |          |          |      |      |                 |                                                                                                                                                      |
|---------|----------|----------|------|------|-----------------|------------------------------------------------------------------------------------------------------------------------------------------------------|
| SPI1    | 27797817 | 27797896 | 2633 | 2712 | ENSG00000066336 | Spi-1 proto-oncogene<br>[Source:HGNC<br>Symbol;Acc:HGNC:11241]                                                                                       |
| ONECUT2 | 27797815 | 27797890 | 2639 | 2714 | ENSG00000119547 | one cut homeobox 2<br>[Source:HGNC<br>Symbol;Acc:HGNC:8139]                                                                                          |
| ZNF263  | 27797797 | 27797824 | 2705 | 2732 | ENSG00000006194 | zinc finger protein 263<br>[Source:HGNC<br>Symbol;Acc:HGNC:13056]                                                                                    |
| REST    | 27797780 | 27797859 | 2670 | 2749 | ENSG00000084093 | RE1 silencing transcription<br>factor [Source:HGNC<br>Symbol;Acc:HGNC:9966]                                                                          |
| TP63    | 27797759 | 27797852 | 2677 | 2770 | ENSG00000073282 | tumor protein p63<br>[Source:HGNC<br>Symbol;Acc:HGNC:15979]                                                                                          |
| PARP1   | 27797756 | 27797849 | 2680 | 2773 | ENSG00000143799 | poly(ADP-ribose)<br>polymerase 1<br>[Source:HGNC<br>Symbol;Acc:HGNC:270]                                                                             |
| SMARCA4 | 27797699 | 27797804 | 2725 | 2830 | ENSG00000127616 | SWI/SNF related, matrix<br>associated, actin<br>dependent regulator of<br>chromatin, subfamily a,<br>member 4 [Source:HGNC<br>Symbol;Acc:HGNC:11100] |
| FOXA1   | 27797683 | 27797786 | 2743 | 2846 | ENSG00000129514 | forkhead box A1<br>[Source:HGNC<br>Symbol;Acc:HGNC:5021]                                                                                             |
| CEBPB   | 27797680 | 27797716 | 2813 | 2849 | ENSG00000172216 | CCAAT enhancer binding<br>protein beta                                                                                                               |

|        |          |          |      |      |                 |                                                                             |
|--------|----------|----------|------|------|-----------------|-----------------------------------------------------------------------------|
|        |          |          |      |      |                 | [Source:HGNC<br>Symbol;Acc:HGNC:1834]                                       |
| ESR1   | 27797644 | 27797749 | 2780 | 2885 | ENSG00000091831 | estrogen receptor 1<br>[Source:HGNC<br>Symbol;Acc:HGNC:3467]                |
| STAG1  | 27797627 | 27797724 | 2805 | 2902 | ENSG00000118007 | stromal antigen 1<br>[Source:HGNC<br>Symbol;Acc:HGNC:11354]                 |
| SRF    | 27797588 | 27797610 | 2919 | 2941 | ENSG00000112658 | serum response factor<br>[Source:HGNC<br>Symbol;Acc:HGNC:11291]             |
| CTCF   | 27797580 | 27797605 | 2924 | 2949 | ENSG00000102974 | CCCTC-binding factor<br>[Source:HGNC<br>Symbol;Acc:HGNC:13723]              |
| CUL4A  | 27797578 | 27797657 | 2872 | 2951 | ENSG00000139842 | cullin 4A [Source:HGNC<br>Symbol;Acc:HGNC:2554]                             |
| RAD21  | 27797578 | 27797623 | 2906 | 2951 | ENSG00000164754 | RAD21 cohesin complex<br>component<br>[Source:HGNC<br>Symbol;Acc:HGNC:9811] |
| SOX2   | 27797574 | 27797663 | 2866 | 2955 | ENSG00000181449 | SRY-box transcription<br>factor 2 [Source:HGNC<br>Symbol;Acc:HGNC:11195]    |
| CTCF_L | 27797570 | 27797609 | 2920 | 2959 | ENSG00000124092 | CCCTC-binding factor like<br>[Source:HGNC<br>Symbol;Acc:HGNC:16234]         |
| E2F1   | 27797567 | 27797662 | 2867 | 2962 | ENSG00000101412 | E2F transcription factor 1<br>[Source:HGNC<br>Symbol;Acc:HGNC:3113]         |

|         |          |          |      |      |                 |                                                                                                                                                      |
|---------|----------|----------|------|------|-----------------|------------------------------------------------------------------------------------------------------------------------------------------------------|
| KLF4    | 27797557 | 27797646 | 2883 | 2972 | ENSG00000136826 | Kruppel like factor 4<br>[Source:HGNC<br>Symbol;Acc:HGNC:6348]                                                                                       |
| ESR1    | 27797555 | 27797660 | 2869 | 2974 | ENSG00000091831 | estrogen receptor 1<br>[Source:HGNC<br>Symbol;Acc:HGNC:3467]                                                                                         |
| SMARCA4 | 27797535 | 27797640 | 2889 | 2994 | ENSG00000127616 | SWI/SNF related, matrix<br>associated, actin<br>dependent regulator of<br>chromatin, subfamily a,<br>member 4 [Source:HGNC<br>Symbol;Acc:HGNC:11100] |
| SUZ12   | 27797510 | 27797611 | 2918 | 3019 | ENSG00000178691 | SUZ12 polycomb<br>repressive complex 2<br>subunit [Source:HGNC<br>Symbol;Acc:HGNC:17101]                                                             |
| FOXA1   | 27797506 | 27797609 | 2920 | 3023 | ENSG00000129514 | forkhead box A1<br>[Source:HGNC<br>Symbol;Acc:HGNC:5021]                                                                                             |
| E2F6    | 27797498 | 27797574 | 2955 | 3031 | ENSG00000169016 | E2F transcription factor 6<br>[Source:HGNC<br>Symbol;Acc:HGNC:3120]                                                                                  |
| ESR1    | 27797397 | 27797502 | 3027 | 3132 | ENSG00000091831 | estrogen receptor 1<br>[Source:HGNC<br>Symbol;Acc:HGNC:3467]                                                                                         |
| SOX8    | 27797396 | 27797485 | 3044 | 3133 | ENSG00000005513 | SRY-box transcription<br>factor 8 [Source:HGNC<br>Symbol;Acc:HGNC:11203]                                                                             |
| ESR1    | 27797271 | 27797376 | 3153 | 3258 | ENSG00000091831 | estrogen receptor 1<br>[Source:HGNC<br>Symbol;Acc:HGNC:3467]                                                                                         |

|       |          |          |      |      |                 |                                                                                               |
|-------|----------|----------|------|------|-----------------|-----------------------------------------------------------------------------------------------|
| PARP1 | 27797247 | 27797340 | 3189 | 3282 | ENSG00000143799 | poly(ADP-ribose)<br>polymerase 1<br>[Source:HGNC<br>Symbol;Acc:HGNC:270]                      |
| CRY1  | 27797242 | 27797343 | 3186 | 3287 | ENSG00000008405 | cryptochrome circadian<br>regulator 1 [Source:HGNC<br>Symbol;Acc:HGNC:2384]                   |
| UBP1  | 27797215 | 27797316 | 3213 | 3314 | ENSG00000153560 | upstream binding protein<br>1 [Source:HGNC<br>Symbol;Acc:HGNC:12507]                          |
| DTL   | 27797124 | 27797225 | 3304 | 3405 | ENSG00000143476 | denticleless E3 ubiquitin<br>protein ligase homolog<br>[Source:HGNC<br>Symbol;Acc:HGNC:30288] |
| CTCF  | 27797082 | 27797185 | 3344 | 3447 | ENSG00000102974 | CCCTC-binding factor<br>[Source:HGNC<br>Symbol;Acc:HGNC:13723]                                |
| ESR1  | 27797023 | 27797128 | 3401 | 3506 | ENSG00000091831 | estrogen receptor 1<br>[Source:HGNC<br>Symbol;Acc:HGNC:3467]                                  |
| SUZ12 | 27797005 | 27797100 | 3429 | 3524 | ENSG00000178691 | SUZ12 polycomb<br>repressive complex 2<br>subunit [Source:HGNC<br>Symbol;Acc:HGNC:17101]      |
| REST  | 27796992 | 27797089 | 3440 | 3537 | ENSG00000084093 | RE1 silencing transcription<br>factor [Source:HGNC<br>Symbol;Acc:HGNC:9966]                   |
| TP53  | 27796984 | 27797095 | 3434 | 3545 | ENSG00000141510 | tumor protein p53<br>[Source:HGNC<br>Symbol;Acc:HGNC:11998]                                   |

|       |          |          |      |      |                 |                                                                                               |
|-------|----------|----------|------|------|-----------------|-----------------------------------------------------------------------------------------------|
| FOXA1 | 27796979 | 27797082 | 3447 | 3550 | ENSG00000129514 | forkhead box A1<br>[Source:HGNC<br>Symbol;Acc:HGNC:5021]                                      |
| GLI1  | 27796956 | 27797015 | 3514 | 3573 | ENSG00000111087 | GLI family zinc finger 1<br>[Source:HGNC<br>Symbol;Acc:HGNC:4317]                             |
| ESR1  | 27796943 | 27797048 | 3481 | 3586 | ENSG00000091831 | estrogen receptor 1<br>[Source:HGNC<br>Symbol;Acc:HGNC:3467]                                  |
| ZFP36 | 27796924 | 27796991 | 3538 | 3605 | ENSG00000128016 | ZFP36 ring finger protein<br>[Source:HGNC<br>Symbol;Acc:HGNC:12862]                           |
| BRD4  | 27796894 | 27796999 | 3530 | 3635 | ENSG00000141867 | bromodomain containing 4<br>[Source:HGNC<br>Symbol;Acc:HGNC:13575]                            |
| ZNF16 | 27796893 | 27796994 | 3535 | 3636 | ENSG00000170631 | zinc finger protein 16<br>[Source:HGNC<br>Symbol;Acc:HGNC:12947]                              |
| RUNX1 | 27796885 | 27796980 | 3549 | 3644 | ENSG00000159216 | RUNX family transcription<br>factor 1 [Source:HGNC<br>Symbol;Acc:HGNC:10471]                  |
| DTL   | 27796848 | 27796949 | 3580 | 3681 | ENSG00000143476 | denticleless E3 ubiquitin<br>protein ligase homolog<br>[Source:HGNC<br>Symbol;Acc:HGNC:30288] |
| SIRT1 | 27796801 | 27796880 | 3649 | 3728 | ENSG00000096717 | sirtuin 1 [Source:HGNC<br>Symbol;Acc:HGNC:14929]                                              |
| AR    | 27796755 | 27796802 | 3727 | 3774 | ENSG00000169083 | androgen receptor<br>[Source:HGNC<br>Symbol;Acc:HGNC:644]                                     |

|         |          |          |      |      |                 |                                                                                                                                       |
|---------|----------|----------|------|------|-----------------|---------------------------------------------------------------------------------------------------------------------------------------|
| SUZ12   | 27796753 | 27796852 | 3677 | 3776 | ENSG00000178691 | SUZ12 polycomb repressive complex 2 subunit [Source:HGNC Symbol;Acc:HGNC:17101]                                                       |
| ESR1    | 27796720 | 27796779 | 3750 | 3809 | ENSG00000091831 | estrogen receptor 1 [Source:HGNC Symbol;Acc:HGNC:3467]                                                                                |
| HDAC2   | 27796673 | 27796768 | 3761 | 3856 | ENSG00000196591 | histone deacetylase 2 [Source:HGNC Symbol;Acc:HGNC:4853]                                                                              |
| BRD4    | 27796669 | 27796774 | 3755 | 3860 | ENSG00000141867 | bromodomain containing 4 [Source:HGNC Symbol;Acc:HGNC:13575]                                                                          |
| SMARCA4 | 27796619 | 27796724 | 3805 | 3910 | ENSG00000127616 | SWI/SNF related, matrix associated, actin dependent regulator of chromatin, subfamily a, member 4 [Source:HGNC Symbol;Acc:HGNC:11100] |
| FLI1    | 27796583 | 27796684 | 3845 | 3946 | ENSG00000151702 | Fli-1 proto-oncogene, ETS transcription factor [Source:HGNC Symbol;Acc:HGNC:3749]                                                     |
| DTL     | 27796577 | 27796678 | 3851 | 3952 | ENSG00000143476 | denticleless E3 ubiquitin protein ligase homolog [Source:HGNC Symbol;Acc:HGNC:30288]                                                  |
| ESR1    | 27796576 | 27796681 | 3848 | 3953 | ENSG00000091831 | estrogen receptor 1 [Source:HGNC Symbol;Acc:HGNC:3467]                                                                                |



|        |          |          |      |      |                 |                                                                                  |
|--------|----------|----------|------|------|-----------------|----------------------------------------------------------------------------------|
| SUZ12  | 27796559 | 27796654 | 3875 | 3970 | ENSG00000178691 | SUZ12 polycomb repressive complex 2 subunit [Source:HGNC Symbol;Acc:HGNC:17101]  |
| SOX8   | 27796410 | 27796499 | 4030 | 4119 | ENSG00000005513 | SRY-box transcription factor 8 [Source:HGNC Symbol;Acc:HGNC:11203]               |
| CTCF   | 27796361 | 27796464 | 4065 | 4168 | ENSG00000102974 | CCCTC-binding factor [Source:HGNC Symbol;Acc:HGNC:13723]                         |
| NR3C1  | 27796315 | 27796414 | 4115 | 4214 | ENSG00000113580 | nuclear receptor subfamily 3 group C member 1 [Source:HGNC Symbol;Acc:HGNC:7978] |
| SUZ12  | 27796182 | 27796277 | 4252 | 4347 | ENSG00000178691 | SUZ12 polycomb repressive complex 2 subunit [Source:HGNC Symbol;Acc:HGNC:17101]  |
| SFPQ   | 27796103 | 27796162 | 4367 | 4426 | ENSG00000116560 | splicing factor proline and glutamine rich [Source:HGNC Symbol;Acc:HGNC:10774]   |
| ZNF121 | 27796023 | 27796098 | 4431 | 4506 | ENSG00000197961 | zinc finger protein 121 [Source:HGNC Symbol;Acc:HGNC:12904]                      |
| SPI1   | 27796006 | 27796119 | 4410 | 4523 | ENSG00000066336 | Spi-1 proto-oncogene [Source:HGNC Symbol;Acc:HGNC:11241]                         |
| TWIST1 | 27795976 | 27796057 | 4472 | 4553 | ENSG00000122691 | twist family bHLH transcription factor 1                                         |

|       |          |          |      |      |                 |                                                                                                 |
|-------|----------|----------|------|------|-----------------|-------------------------------------------------------------------------------------------------|
|       |          |          |      |      |                 | [Source:HGNC<br>Symbol;Acc:HGNC:12428]                                                          |
| ELF1  | 27795928 | 27796017 | 4512 | 4601 | ENSG00000120690 | E74 like ETS transcription<br>factor 1 [Source:HGNC<br>Symbol;Acc:HGNC:3316]                    |
| PARP1 | 27795887 | 27795980 | 4549 | 4642 | ENSG00000143799 | poly(ADP-ribose)<br>polymerase 1<br>[Source:HGNC<br>Symbol;Acc:HGNC:270]                        |
| ARNT  | 27795770 | 27795853 | 4676 | 4759 | ENSG00000143437 | aryl hydrocarbon receptor<br>nuclear translocator<br>[Source:HGNC<br>Symbol;Acc:HGNC:700]       |
| CDK2  | 27795625 | 27795718 | 4811 | 4904 | ENSG00000123374 | cyclin dependent kinase 2<br>[Source:HGNC<br>Symbol;Acc:HGNC:1771]                              |
| STAT1 | 27795539 | 27795622 | 4907 | 4990 | ENSG00000115415 | signal transducer and<br>activator of transcription 1<br>[Source:HGNC<br>Symbol;Acc:HGNC:11362] |
| FOXA2 | 27795501 | 27795594 | 4935 | 5028 | ENSG00000125798 | forkhead box A2<br>[Source:HGNC<br>Symbol;Acc:HGNC:5022]                                        |
| NR3C1 | 27795400 | 27795494 | 5035 | 5129 | ENSG00000113580 | nuclear receptor subfamily<br>3 group C member 1<br>[Source:HGNC<br>Symbol;Acc:HGNC:7978]       |
| GATA2 | 27795393 | 27795429 | 5100 | 5136 | ENSG00000179348 | GATA binding protein 2<br>[Source:HGNC<br>Symbol;Acc:HGNC:4171]                                 |

|         |          |          |      |      |                 |                                                                                                                                                      |
|---------|----------|----------|------|------|-----------------|------------------------------------------------------------------------------------------------------------------------------------------------------|
| ERF     | 27795376 | 27795412 | 5117 | 5153 | ENSG00000105722 | ETS2 repressor factor<br>[Source:HGNC<br>Symbol;Acc:HGNC:3444]                                                                                       |
| SMARCA4 | 27795376 | 27795481 | 5048 | 5153 | ENSG00000127616 | SWI/SNF related, matrix<br>associated, actin<br>dependent regulator of<br>chromatin, subfamily a,<br>member 4 [Source:HGNC<br>Symbol;Acc:HGNC:11100] |
| FOXA1   | 27795375 | 27795394 | 5135 | 5154 | ENSG00000129514 | forkhead box A1<br>[Source:HGNC<br>Symbol;Acc:HGNC:5021]                                                                                             |
| FOXA2   | 27795371 | 27795408 | 5121 | 5158 | ENSG00000125798 | forkhead box A2<br>[Source:HGNC<br>Symbol;Acc:HGNC:5022]                                                                                             |
| SUMO2   | 27795370 | 27795412 | 5117 | 5159 | ENSG00000188612 | small ubiquitin like<br>modifier 2 [Source:HGNC<br>Symbol;Acc:HGNC:11125]                                                                            |
| TLE3    | 27795369 | 27795393 | 5136 | 5160 | ENSG00000140332 | TLE family member 3,<br>transcriptional corepressor<br>[Source:HGNC<br>Symbol;Acc:HGNC:11839]                                                        |
| BDP1    | 27795369 | 27795462 | 5067 | 5160 | ENSG00000273873 | B double prime 1, subunit<br>of RNA polymerase III<br>transcription initiation<br>factor IIIB [Source:HGNC<br>Symbol;Acc:HGNC:13652]                 |
| AR      | 27795367 | 27795397 | 5132 | 5162 | ENSG00000169083 | androgen receptor<br>[Source:HGNC<br>Symbol;Acc:HGNC:644]                                                                                            |

|         |          |          |      |      |                 |                                                                                             |
|---------|----------|----------|------|------|-----------------|---------------------------------------------------------------------------------------------|
| NKX3-1  | 27795362 | 27795418 | 5111 | 5167 | ENSG00000167034 | NK3 homeobox 1<br>[Source:HGNC<br>Symbol;Acc:HGNC:7838]                                     |
| HOXB13  | 27795361 | 27795396 | 5133 | 5168 | ENSG00000159184 | homeobox B13<br>[Source:HGNC<br>Symbol;Acc:HGNC:5112]                                       |
| ONECUT2 | 27795353 | 27795390 | 5139 | 5176 | ENSG00000119547 | one cut homeobox 2<br>[Source:HGNC<br>Symbol;Acc:HGNC:8139]                                 |
| SPI1    | 27795343 | 27795456 | 5073 | 5186 | ENSG00000066336 | Spi-1 proto-oncogene<br>[Source:HGNC<br>Symbol;Acc:HGNC:11241]                              |
| MBL2    | 27795343 | 27795386 | 5143 | 5186 | ENSG00000165471 | mannose binding lectin 2<br>[Source:HGNC<br>Symbol;Acc:HGNC:6922]                           |
| ARID1A  | 27795340 | 27795433 | 5096 | 5189 | ENSG00000117713 | AT-rich interaction domain<br>1A [Source:HGNC<br>Symbol;Acc:HGNC:11110]                     |
| PIAS1   | 27795337 | 27795414 | 5115 | 5192 | ENSG00000033800 | protein inhibitor of<br>activated STAT 1<br>[Source:HGNC<br>Symbol;Acc:HGNC:2752]           |
| ERG     | 27795315 | 27795393 | 5136 | 5214 | ENSG00000157554 | ETS transcription factor<br>ERG [Source:HGNC<br>Symbol;Acc:HGNC:3446]                       |
| ASCL2   | 27795250 | 27795331 | 5198 | 5279 | ENSG00000183734 | achaete-scute family<br>bHLH transcription factor<br>2 [Source:HGNC<br>Symbol;Acc:HGNC:739] |

|         |          |          |      |      |                 |                                                                                       |
|---------|----------|----------|------|------|-----------------|---------------------------------------------------------------------------------------|
| FOXA2   | 27795210 | 27795303 | 5226 | 5319 | ENSG00000125798 | forkhead box A2<br>[Source:HGNC<br>Symbol;Acc:HGNC:5022]                              |
| PARP1   | 27795204 | 27795297 | 5232 | 5325 | ENSG00000143799 | poly(ADP-ribose)<br>polymerase 1<br>[Source:HGNC<br>Symbol;Acc:HGNC:270]              |
| ZKSCAN1 | 27795185 | 27795299 | 5230 | 5344 | ENSG00000106261 | zinc finger with KRAB and<br>SCAN domains 1<br>[Source:HGNC<br>Symbol;Acc:HGNC:13101] |
| AHR     | 27795185 | 27795262 | 5267 | 5344 | ENSG00000106546 | aryl hydrocarbon receptor<br>[Source:HGNC<br>Symbol;Acc:HGNC:348]                     |
| ESR1    | 27795183 | 27795288 | 5241 | 5346 | ENSG00000091831 | estrogen receptor 1<br>[Source:HGNC<br>Symbol;Acc:HGNC:3467]                          |
| NFKB1   | 27795172 | 27795253 | 5276 | 5357 | ENSG00000109320 | nuclear factor kappa B<br>subunit 1 [Source:HGNC<br>Symbol;Acc:HGNC:7794]             |
| ZNF490  | 27795165 | 27795292 | 5237 | 5364 | ENSG00000188033 | zinc finger protein 490<br>[Source:HGNC<br>Symbol;Acc:HGNC:23705]                     |
| CTCF    | 27795158 | 27795243 | 5286 | 5371 | ENSG00000102974 | CCCTC-binding factor<br>[Source:HGNC<br>Symbol;Acc:HGNC:13723]                        |
| ME1     | 27795143 | 27795215 | 5314 | 5386 | ENSG00000065833 | malic enzyme 1<br>[Source:HGNC<br>Symbol;Acc:HGNC:6983]                               |
| ARNTL   | 27795135 | 27795218 | 5311 | 5394 | ENSG00000133794 | aryl hydrocarbon receptor<br>nuclear translocator like                                |

|         |          |          |      |      |                 |                                                                                         |
|---------|----------|----------|------|------|-----------------|-----------------------------------------------------------------------------------------|
|         |          |          |      |      |                 | [Source:HGNC<br>Symbol;Acc:HGNC:701]                                                    |
| ZKSCAN1 | 27795108 | 27795163 | 5366 | 5421 | ENSG00000106261 | zinc finger with KRAB and<br>SCAN domains 1<br>[Source:HGNC<br>Symbol;Acc:HGNC:13101]   |
| SPI1    | 27795104 | 27795165 | 5364 | 5425 | ENSG00000066336 | Spi-1 proto-oncogene<br>[Source:HGNC<br>Symbol;Acc:HGNC:11241]                          |
| BPTF    | 27795077 | 27795170 | 5359 | 5452 | ENSG00000171634 | bromodomain PHD finger<br>transcription factor<br>[Source:HGNC<br>Symbol;Acc:HGNC:3581] |
| ESR1    | 27795067 | 27795146 | 5383 | 5462 | ENSG00000091831 | estrogen receptor 1<br>[Source:HGNC<br>Symbol;Acc:HGNC:3467]                            |
| AR      | 27795030 | 27795135 | 5394 | 5499 | ENSG00000169083 | androgen receptor<br>[Source:HGNC<br>Symbol;Acc:HGNC:644]                               |
| ZFH2    | 27795025 | 27795158 | 5371 | 5504 | ENSG00000136367 | zinc finger homeobox 2<br>[Source:HGNC<br>Symbol;Acc:HGNC:20152]                        |
| CTCF    | 27795024 | 27795057 | 5472 | 5505 | ENSG00000102974 | CCCTC-binding factor<br>[Source:HGNC<br>Symbol;Acc:HGNC:13723]                          |
| GATA2   | 27795022 | 27795111 | 5418 | 5507 | ENSG00000179348 | GATA binding protein 2<br>[Source:HGNC<br>Symbol;Acc:HGNC:4171]                         |
| RAD21   | 27795017 | 27795079 | 5450 | 5512 | ENSG00000164754 | RAD21 cohesin complex<br>component                                                      |

|        |          |          |      |      |                 |                                                                                          |
|--------|----------|----------|------|------|-----------------|------------------------------------------------------------------------------------------|
|        |          |          |      |      |                 | [Source:HGNC<br>Symbol;Acc:HGNC:9811]                                                    |
| EGR2   | 27795011 | 27795097 | 5432 | 5518 | ENSG00000122877 | early growth response 2<br>[Source:HGNC<br>Symbol;Acc:HGNC:3239]                         |
| SP5    | 27794995 | 27795020 | 5509 | 5534 | ENSG00000204335 | Sp5 transcription factor<br>[Source:HGNC<br>Symbol;Acc:HGNC:14529]                       |
| ORC1   | 27794988 | 27795123 | 5406 | 5541 | ENSG00000085840 | origin recognition complex<br>subunit 1 [Source:HGNC<br>Symbol;Acc:HGNC:8487]            |
| SUZ12  | 27794987 | 27795082 | 5447 | 5542 | ENSG00000178691 | SUZ12 polycomb<br>repressive complex 2<br>subunit [Source:HGNC<br>Symbol;Acc:HGNC:17101] |
| MAZ    | 27794974 | 27795065 | 5464 | 5555 | ENSG00000103495 | MYC associated zinc<br>finger protein<br>[Source:HGNC<br>Symbol;Acc:HGNC:6914]           |
| BMI1   | 27794974 | 27795059 | 5470 | 5555 | ENSG00000168283 | BMI1 proto-oncogene,<br>polycomb ring finger<br>[Source:HGNC<br>Symbol;Acc:HGNC:1066]    |
| KLF15  | 27794969 | 27795012 | 5517 | 5560 | ENSG00000163884 | Kruppel like factor 15<br>[Source:HGNC<br>Symbol;Acc:HGNC:14536]                         |
| ZNF692 | 27794968 | 27794993 | 5536 | 5561 | ENSG00000171163 | zinc finger protein 692<br>[Source:HGNC<br>Symbol;Acc:HGNC:26049]                        |

|        |          |          |      |      |                 |                                                                            |
|--------|----------|----------|------|------|-----------------|----------------------------------------------------------------------------|
| HNF4A  | 27794963 | 27795040 | 5489 | 5566 | ENSG00000101076 | hepatocyte nuclear factor<br>4 alpha [Source:HGNC<br>Symbol;Acc:HGNC:5024] |
| EGR3   | 27794960 | 27795087 | 5442 | 5569 | ENSG00000179388 | early growth response 3<br>[Source:HGNC<br>Symbol;Acc:HGNC:3240]           |
| ZNF143 | 27794929 | 27795024 | 5505 | 5600 | ENSG00000166478 | zinc finger protein 143<br>[Source:HGNC<br>Symbol;Acc:HGNC:12928]          |
| ZFP69B | 27794921 | 27795022 | 5507 | 5608 | ENSG00000187801 | ZFP69 zinc finger protein<br>B [Source:HGNC<br>Symbol;Acc:HGNC:28053]      |
| FOXA1  | 27794916 | 27795019 | 5510 | 5613 | ENSG00000129514 | forkhead box A1<br>[Source:HGNC<br>Symbol;Acc:HGNC:5021]                   |
| ZNF467 | 27794891 | 27795042 | 5487 | 5638 | ENSG00000181444 | zinc finger protein 467<br>[Source:HGNC<br>Symbol;Acc:HGNC:23154]          |
| AR     | 27794793 | 27794898 | 5631 | 5736 | ENSG00000169083 | androgen receptor<br>[Source:HGNC<br>Symbol;Acc:HGNC:644]                  |
| ESR1   | 27794753 | 27794858 | 5671 | 5776 | ENSG00000091831 | estrogen receptor 1<br>[Source:HGNC<br>Symbol;Acc:HGNC:3467]               |
| ERG    | 27794704 | 27794799 | 5730 | 5825 | ENSG00000157554 | ETS transcription factor<br>ERG [Source:HGNC<br>Symbol;Acc:HGNC:3446]      |
| FOXA1  | 27794699 | 27794728 | 5801 | 5830 | ENSG00000129514 | forkhead box A1<br>[Source:HGNC<br>Symbol;Acc:HGNC:5021]                   |



|         |          |          |      |      |                 |                                                                                                                                                      |
|---------|----------|----------|------|------|-----------------|------------------------------------------------------------------------------------------------------------------------------------------------------|
| FOXA2   | 27794683 | 27794776 | 5753 | 5846 | ENSG00000125798 | forkhead box A2<br>[Source:HGNC<br>Symbol;Acc:HGNC:5022]                                                                                             |
| ZSCAN4  | 27794660 | 27794783 | 5746 | 5869 | ENSG00000180532 | zinc finger and SCAN<br>domain containing 4<br>[Source:HGNC<br>Symbol;Acc:HGNC:23709]                                                                |
| ZNF264  | 27794611 | 27794716 | 5813 | 5918 | ENSG00000083844 | zinc finger protein 264<br>[Source:HGNC<br>Symbol;Acc:HGNC:13057]                                                                                    |
| KDM1A   | 27794572 | 27794667 | 5862 | 5957 | ENSG00000004487 | lysine demethylase 1A<br>[Source:HGNC<br>Symbol;Acc:HGNC:29079]                                                                                      |
| ZFP64   | 27794529 | 27794622 | 5907 | 6000 | ENSG00000020256 | ZFP64 Zinc Finger Protein                                                                                                                            |
| GATA1   | 27794507 | 27794528 | 6001 | 6022 | ENSG00000102145 | GATA binding protein 1<br>[Source:HGNC<br>Symbol;Acc:HGNC:4170]                                                                                      |
| AR      | 27794475 | 27794592 | 5937 | 6054 | ENSG00000169083 | androgen receptor<br>[Source:HGNC<br>Symbol;Acc:HGNC:644]                                                                                            |
| EZH2    | 27794462 | 27794561 | 5968 | 6067 | ENSG00000106462 | enhancer of zeste 2<br>polycomb repressive<br>complex 2 subunit<br>[Source:HGNC<br>Symbol;Acc:HGNC:3527]                                             |
| SMARCA4 | 27794460 | 27794565 | 5964 | 6069 | ENSG00000127616 | SWI/SNF related, matrix<br>associated, actin<br>dependent regulator of<br>chromatin, subfamily a,<br>member 4 [Source:HGNC<br>Symbol;Acc:HGNC:11100] |

|        |          |          |      |      |                 |                                                                                             |
|--------|----------|----------|------|------|-----------------|---------------------------------------------------------------------------------------------|
| SPI1   | 27794437 | 27794550 | 5979 | 6092 | ENSG00000066336 | Spi-1 proto-oncogene<br>[Source:HGNC<br>Symbol;Acc:HGNC:11241]                              |
| GATA4  | 27794421 | 27794468 | 6061 | 6108 | ENSG00000285109 | GATA binding protein 4<br>[Source:HGNC<br>Symbol;Acc:HGNC:4173]                             |
| ZNF263 | 27794417 | 27794444 | 6085 | 6112 | ENSG0000006194  | zinc finger protein 263<br>[Source:HGNC<br>Symbol;Acc:HGNC:13056]                           |
| CHD1   | 27794414 | 27794503 | 6026 | 6115 | ENSG00000153922 | chromodomain helicase<br>DNA binding protein 1<br>[Source:HGNC<br>Symbol;Acc:HGNC:1915]     |
| GRHL3  | 27794397 | 27794470 | 6059 | 6132 | ENSG00000158055 | grainyhead like<br>transcription factor 3<br>[Source:HGNC<br>Symbol;Acc:HGNC:25839]         |
| RUNX1  | 27794397 | 27794492 | 6037 | 6132 | ENSG00000159216 | RUNX family transcription<br>factor 1 [Source:HGNC<br>Symbol;Acc:HGNC:10471]                |
| ZBTB48 | 27794391 | 27794478 | 6051 | 6138 | ENSG00000204859 | zinc finger and BTB<br>domain containing 48<br>[Source:HGNC<br>Symbol;Acc:HGNC:4930]        |
| ASCL1  | 27794390 | 27794457 | 6072 | 6139 | ENSG00000139352 | achaete-scute family<br>bHLH transcription factor<br>1 [Source:HGNC<br>Symbol;Acc:HGNC:738] |
| GATA6  | 27794390 | 27794478 | 6051 | 6139 | ENSG00000141448 | GATA binding protein 6<br>[Source:HGNC<br>Symbol;Acc:HGNC:4174]                             |

|        |          |          |      |      |                 |                                                                                 |
|--------|----------|----------|------|------|-----------------|---------------------------------------------------------------------------------|
| AGO1   | 27794365 | 27794412 | 6117 | 6164 | ENSG00000092847 | argonaute RISC component 1<br>[Source:HGNC Symbol;Acc:HGNC:3262]                |
| BMI1   | 27794365 | 27794450 | 6079 | 6164 | ENSG00000168283 | BMI1 proto-oncogene, polycomb ring finger<br>[Source:HGNC Symbol;Acc:HGNC:1066] |
| ZBTB7A | 27794365 | 27794462 | 6067 | 6164 | ENSG00000178951 | zinc finger and BTB domain containing 7A<br>[Source:HGNC Symbol;Acc:HGNC:18078] |
| CRY1   | 27794358 | 27794459 | 6070 | 6171 | ENSG00000008405 | cryptochrome circadian regulator 1 [Source:HGNC Symbol;Acc:HGNC:2384]           |
| PGR    | 27794358 | 27794467 | 6062 | 6171 | ENSG00000082175 | progesterone receptor<br>[Source:HGNC Symbol;Acc:HGNC:8910]                     |
| ZEB1   | 27794328 | 27794413 | 6116 | 6201 | ENSG00000148516 | zinc finger E-box binding homeobox 1<br>[Source:HGNC Symbol;Acc:HGNC:11642]     |
| ZBTB48 | 27794298 | 27794383 | 6146 | 6231 | ENSG00000204859 | zinc finger and BTB domain containing 48<br>[Source:HGNC Symbol;Acc:HGNC:4930]  |
| BRD4   | 27794295 | 27794396 | 6133 | 6234 | ENSG00000141867 | bromodomain containing 4<br>[Source:HGNC Symbol;Acc:HGNC:13575]                 |

|       |          |          |      |      |                 |                                                                                              |
|-------|----------|----------|------|------|-----------------|----------------------------------------------------------------------------------------------|
| AR    | 27794252 | 27794283 | 6246 | 6277 | ENSG00000169083 | androgen receptor<br>[Source:HGNC<br>Symbol;Acc:HGNC:644]                                    |
| PPARG | 27794235 | 27794318 | 6211 | 6294 | ENSG00000132170 | peroxisome proliferator<br>activated receptor gamma<br>[Source:HGNC<br>Symbol;Acc:HGNC:9236] |
| SUZ12 | 27794234 | 27794333 | 6196 | 6295 | ENSG00000178691 | SUZ12 polycomb<br>repressive complex 2<br>subunit [Source:HGNC<br>Symbol;Acc:HGNC:17101]     |
| PADI2 | 27794223 | 27794294 | 6235 | 6306 | ENSG00000117115 | peptidyl arginine<br>deiminase 2<br>[Source:HGNC<br>Symbol;Acc:HGNC:18341]                   |
| NR3C1 | 27794217 | 27794312 | 6217 | 6312 | ENSG00000113580 | nuclear receptor subfamily<br>3 group C member 1<br>[Source:HGNC<br>Symbol;Acc:HGNC:7978]    |
| FOXA1 | 27794214 | 27794282 | 6247 | 6315 | ENSG00000129514 | forkhead box A1<br>[Source:HGNC<br>Symbol;Acc:HGNC:5021]                                     |
| PGR   | 27794198 | 27794295 | 6234 | 6331 | ENSG00000082175 | progesterone receptor<br>[Source:HGNC<br>Symbol;Acc:HGNC:8910]                               |
| ME1   | 27794187 | 27794272 | 6257 | 6342 | ENSG00000065833 | malic enzyme 1<br>[Source:HGNC<br>Symbol;Acc:HGNC:6983]                                      |
| ESR1  | 27794187 | 27794293 | 6236 | 6342 | ENSG00000091831 | estrogen receptor 1<br>[Source:HGNC<br>Symbol;Acc:HGNC:3467]                                 |

|       |          |          |      |      |                 |                                                                                                          |
|-------|----------|----------|------|------|-----------------|----------------------------------------------------------------------------------------------------------|
| FOXA1 | 27794136 | 27794239 | 6290 | 6393 | ENSG00000129514 | forkhead box A1<br>[Source:HGNC<br>Symbol;Acc:HGNC:5021]                                                 |
| RBM25 | 27794133 | 27794162 | 6367 | 6396 | ENSG00000119707 | RNA binding motif protein<br>25 [Source:HGNC<br>Symbol;Acc:HGNC:23244]                                   |
| NFE2  | 27794131 | 27794146 | 6383 | 6398 | ENSG00000123405 | nuclear factor, erythroid 2<br>[Source:HGNC<br>Symbol;Acc:HGNC:7780]                                     |
| MBD4  | 27794126 | 27794225 | 6304 | 6403 | ENSG00000129071 | methyl-CpG binding<br>domain 4, DNA<br>glycosylase<br>[Source:HGNC<br>Symbol;Acc:HGNC:6919]              |
| STAT1 | 27794121 | 27794183 | 6346 | 6408 | ENSG00000115415 | signal transducer and<br>activator of transcription 1<br>[Source:HGNC<br>Symbol;Acc:HGNC:11362]          |
| EP300 | 27794120 | 27794220 | 6309 | 6409 | ENSG00000100393 | E1A binding protein p300<br>[Source:HGNC<br>Symbol;Acc:HGNC:3373]                                        |
| EZH2  | 27794113 | 27794212 | 6317 | 6416 | ENSG00000106462 | enhancer of zeste 2<br>polycomb repressive<br>complex 2 subunit<br>[Source:HGNC<br>Symbol;Acc:HGNC:3527] |
| NCOR1 | 27794103 | 27794192 | 6337 | 6426 | ENSG00000141027 | nuclear receptor<br>corepressor 1<br>[Source:HGNC<br>Symbol;Acc:HGNC:7672]                               |

|         |          |          |      |      |                 |                                                                                                                                       |
|---------|----------|----------|------|------|-----------------|---------------------------------------------------------------------------------------------------------------------------------------|
| SMARCA4 | 27794079 | 27794184 | 6345 | 6450 | ENSG00000127616 | SWI/SNF related, matrix associated, actin dependent regulator of chromatin, subfamily a, member 4 [Source:HGNC Symbol;Acc:HGNC:11100] |
| OTX2    | 27794076 | 27794139 | 6390 | 6453 | ENSG00000165588 | orthodenticle homeobox 2 [Source:HGNC Symbol;Acc:HGNC:8522]                                                                           |
| BRD4    | 27794063 | 27794108 | 6421 | 6466 | ENSG00000141867 | bromodomain containing 4 [Source:HGNC Symbol;Acc:HGNC:13575]                                                                          |
| TBP     | 27794056 | 27794141 | 6388 | 6473 | ENSG00000112592 | TATA-box binding protein [Source:HGNC Symbol;Acc:HGNC:11588]                                                                          |
| CREB5   | 27794020 | 27794065 | 6464 | 6509 | ENSG00000146592 | cAMP responsive element binding protein 5 [Source:HGNC Symbol;Acc:HGNC:16844]                                                         |
| ERF     | 27794015 | 27794043 | 6486 | 6514 | ENSG00000105722 | ETS2 repressor factor [Source:HGNC Symbol;Acc:HGNC:3444]                                                                              |
| ERG     | 27794014 | 27794052 | 6477 | 6515 | ENSG00000157554 | ETS transcription factor ERG [Source:HGNC Symbol;Acc:HGNC:3446]                                                                       |
| SOX8    | 27794012 | 27794101 | 6428 | 6517 | ENSG00000005513 | SRY-box transcription factor 8 [Source:HGNC Symbol;Acc:HGNC:11203]                                                                    |
| E2F1    | 27794008 | 27794041 | 6488 | 6521 | ENSG00000101412 | E2F transcription factor 1 [Source:HGNC Symbol;Acc:HGNC:3113]                                                                         |

|        |          |          |      |      |                 |                                                                                               |
|--------|----------|----------|------|------|-----------------|-----------------------------------------------------------------------------------------------|
| MYCN   | 27794008 | 27794103 | 6426 | 6521 | ENSG00000134323 | MYCN proto-oncogene,<br>bHLH transcription factor<br>[Source:HGNC<br>Symbol;Acc:HGNC:7559]    |
| GATA2  | 27794008 | 27794067 | 6462 | 6521 | ENSG00000179348 | GATA binding protein 2<br>[Source:HGNC<br>Symbol;Acc:HGNC:4171]                               |
| NKX3-1 | 27794007 | 27794050 | 6479 | 6522 | ENSG00000167034 | NK3 homeobox 1<br>[Source:HGNC<br>Symbol;Acc:HGNC:7838]                                       |
| HOXB13 | 27794005 | 27794026 | 6503 | 6524 | ENSG00000159184 | homeobox B13<br>[Source:HGNC<br>Symbol;Acc:HGNC:5112]                                         |
| AR     | 27794003 | 27794032 | 6497 | 6526 | ENSG00000169083 | androgen receptor<br>[Source:HGNC<br>Symbol;Acc:HGNC:644]                                     |
| ARID1A | 27794002 | 27794050 | 6479 | 6527 | ENSG00000117713 | AT-rich interaction domain<br>1A [Source:HGNC<br>Symbol;Acc:HGNC:11110]                       |
| TLE3   | 27793999 | 27794028 | 6501 | 6530 | ENSG00000140332 | TLE family member 3,<br>transcriptional corepressor<br>[Source:HGNC<br>Symbol;Acc:HGNC:11839] |
| CDX2   | 27793998 | 27794038 | 6491 | 6531 | ENSG00000165556 | caudal type homeobox 2<br>[Source:HGNC<br>Symbol;Acc:HGNC:1806]                               |
| FOXA1  | 27793995 | 27794023 | 6506 | 6534 | ENSG00000129514 | forkhead box A1<br>[Source:HGNC<br>Symbol;Acc:HGNC:5021]                                      |
| PIAS1  | 27793994 | 27794027 | 6502 | 6535 | ENSG00000033800 | protein inhibitor of<br>activated STAT 1                                                      |

|             |          |          |      |      |                 |                                                                                                 |
|-------------|----------|----------|------|------|-----------------|-------------------------------------------------------------------------------------------------|
|             |          |          |      |      |                 | [Source:HGNC<br>Symbol;Acc:HGNC:2752]                                                           |
| TCF7L2/LEF1 | 27793993 | 27794078 | 6451 | 6536 | ENSG00000148737 | transcription factor 7 like 2<br>[Source:HGNC<br>Symbol;Acc:HGNC:11641]                         |
| NCOR1       | 27793991 | 27794076 | 6453 | 6538 | ENSG00000141027 | nuclear receptor<br>corepressor 1<br>[Source:HGNC<br>Symbol;Acc:HGNC:7672]                      |
| TRIM28      | 27793990 | 27794083 | 6446 | 6539 | ENSG00000130726 | tripartite motif containing<br>28 [Source:HGNC<br>Symbol;Acc:HGNC:16384]                        |
| MBL2        | 27793990 | 27794030 | 6499 | 6539 | ENSG00000165471 | mannose binding lectin 2<br>[Source:HGNC<br>Symbol;Acc:HGNC:6922]                               |
| NR3C1       | 27793988 | 27794083 | 6446 | 6541 | ENSG00000113580 | nuclear receptor subfamily<br>3 group C member 1<br>[Source:HGNC<br>Symbol;Acc:HGNC:7978]       |
| STAT1       | 27793984 | 27794061 | 6468 | 6545 | ENSG00000115415 | signal transducer and<br>activator of transcription 1<br>[Source:HGNC<br>Symbol;Acc:HGNC:11362] |
| SUMO2       | 27793983 | 27794026 | 6503 | 6546 | ENSG00000188612 | small ubiquitin like<br>modifier 2 [Source:HGNC<br>Symbol;Acc:HGNC:11125]                       |
| KDM1A       | 27793981 | 27794064 | 6465 | 6548 | ENSG00000004487 | lysine demethylase 1A<br>[Source:HGNC<br>Symbol;Acc:HGNC:29079]                                 |



|        |          |          |      |      |                 |                                                                                             |
|--------|----------|----------|------|------|-----------------|---------------------------------------------------------------------------------------------|
| NANOG  | 27793976 | 27794071 | 6458 | 6553 | ENSG00000111704 | Nanog homeobox<br>[Source:HGNC<br>Symbol;Acc:HGNC:20857]                                    |
| PRDM6  | 27793969 | 27794032 | 6497 | 6560 | ENSG00000061455 | PR/SET domain 6<br>[Source:HGNC<br>Symbol;Acc:HGNC:9350]                                    |
| EP300  | 27793968 | 27794084 | 6445 | 6561 | ENSG00000100393 | E1A binding protein p300<br>[Source:HGNC<br>Symbol;Acc:HGNC:3373]                           |
| CREB1  | 27793968 | 27794039 | 6490 | 6561 | ENSG00000118260 | cAMP responsive element<br>binding protein 1<br>[Source:HGNC<br>Symbol;Acc:HGNC:2345]       |
| ASCL2  | 27793965 | 27794046 | 6483 | 6564 | ENSG00000183734 | achaete-scute family<br>bHLH transcription factor<br>2 [Source:HGNC<br>Symbol;Acc:HGNC:739] |
| MYC    | 27793963 | 27794036 | 6493 | 6566 | ENSG00000136997 | MYC proto-oncogene,<br>bHLH transcription factor<br>[Source:HGNC<br>Symbol;Acc:HGNC:7553]   |
| FIP1L1 | 27793962 | 27794051 | 6478 | 6567 | ENSG00000145216 | factor interacting with<br>PAPOLA and CPSF1<br>[Source:HGNC<br>Symbol;Acc:HGNC:19124]       |
| ESR1   | 27793947 | 27793989 | 6540 | 6582 | ENSG00000091831 | estrogen receptor 1<br>[Source:HGNC<br>Symbol;Acc:HGNC:3467]                                |
| MYCN   | 27793946 | 27794041 | 6488 | 6583 | ENSG00000134323 | MYCN proto-oncogene,<br>bHLH transcription factor                                           |

|        |          |          |      |      |                 |                                                                                                          |
|--------|----------|----------|------|------|-----------------|----------------------------------------------------------------------------------------------------------|
|        |          |          |      |      |                 | [Source:HGNC<br>Symbol;Acc:HGNC:7559]                                                                    |
| HNF4G  | 27793939 | 27793986 | 6543 | 6590 | ENSG00000164749 | hepatocyte nuclear factor<br>4 gamma [Source:HGNC<br>Symbol;Acc:HGNC:5026]                               |
| NANOG  | 27793923 | 27794018 | 6511 | 6606 | ENSG00000111704 | Nanog homeobox<br>[Source:HGNC<br>Symbol;Acc:HGNC:20857]                                                 |
| EZH2   | 27793916 | 27793980 | 6549 | 6613 | ENSG00000106462 | enhancer of zeste 2<br>polycomb repressive<br>complex 2 subunit<br>[Source:HGNC<br>Symbol;Acc:HGNC:3527] |
| ZBTB11 | 27793907 | 27793982 | 6547 | 6622 | ENSG00000066422 | zinc finger and BTB<br>domain containing 11<br>[Source:HGNC<br>Symbol;Acc:HGNC:16740]                    |
| BRD4   | 27793905 | 27793963 | 6566 | 6624 | ENSG00000141867 | bromodomain containing 4<br>[Source:HGNC<br>Symbol;Acc:HGNC:13575]                                       |
| ZEB2   | 27793893 | 27793962 | 6567 | 6636 | ENSG00000169554 | zinc finger E-box binding<br>homeobox 2<br>[Source:HGNC<br>Symbol;Acc:HGNC:14881]                        |
| EP300  | 27793892 | 27793929 | 6600 | 6637 | ENSG00000100393 | E1A binding protein p300<br>[Source:HGNC<br>Symbol;Acc:HGNC:3373]                                        |
| OGG1   | 27793882 | 27793969 | 6560 | 6647 | ENSG00000114026 | 8-oxoguanine DNA<br>glycosylase<br>[Source:HGNC<br>Symbol;Acc:HGNC:8125]                                 |

|        |          |          |      |      |                 |                                                                                       |
|--------|----------|----------|------|------|-----------------|---------------------------------------------------------------------------------------|
| CDK9   | 27793877 | 27793978 | 6551 | 6652 | ENSG00000136807 | cyclin dependent kinase 9<br>[Source:HGNC<br>Symbol;Acc:HGNC:1780]                    |
| CREB1  | 27793872 | 27793963 | 6566 | 6657 | ENSG00000118260 | cAMP responsive element<br>binding protein 1<br>[Source:HGNC<br>Symbol;Acc:HGNC:2345] |
| INTS11 | 27793872 | 27793959 | 6570 | 6657 | ENSG00000127054 | integrator complex subunit<br>11 [Source:HGNC<br>Symbol;Acc:HGNC:26052]               |
| TRPS1  | 27793863 | 27793964 | 6565 | 6666 | ENSG00000104447 | transcriptional repressor<br>GATA binding 1<br>[Source:HGNC<br>Symbol;Acc:HGNC:12340] |
| FOXA2  | 27793858 | 27793961 | 6568 | 6671 | ENSG00000125798 | forkhead box A2<br>[Source:HGNC<br>Symbol;Acc:HGNC:5022]                              |
| ZNF423 | 27793857 | 27793958 | 6571 | 6672 | ENSG00000102935 | zinc finger protein 423<br>[Source:HGNC<br>Symbol;Acc:HGNC:16762]                     |
| TRIM28 | 27793845 | 27793938 | 6591 | 6684 | ENSG00000130726 | tripartite motif containing<br>28 [Source:HGNC<br>Symbol;Acc:HGNC:16384]              |
| KDM2B  | 27793840 | 27793931 | 6598 | 6689 | ENSG00000089094 | lysine demethylase 2B<br>[Source:HGNC<br>Symbol;Acc:HGNC:13610]                       |
| BRD4   | 27793840 | 27793893 | 6636 | 6689 | ENSG00000141867 | bromodomain containing 4<br>[Source:HGNC<br>Symbol;Acc:HGNC:13575]                    |

|         |          |          |      |      |                 |                                                                                              |
|---------|----------|----------|------|------|-----------------|----------------------------------------------------------------------------------------------|
| WT1     | 27793834 | 27793915 | 6614 | 6695 | ENSG00000184937 | WT1 transcription factor<br>[Source:HGNC<br>Symbol;Acc:HGNC:12796]                           |
| TAF15   | 27793834 | 27793885 | 6644 | 6695 | ENSG00000276833 | TATA-box binding protein<br>associated factor 15<br>[Source:HGNC<br>Symbol;Acc:HGNC:11547]   |
| SP3     | 27793832 | 27793857 | 6672 | 6697 | ENSG00000172845 | Sp3 transcription factor<br>[Source:HGNC<br>Symbol;Acc:HGNC:11208]                           |
| FOXA1   | 27793827 | 27793930 | 6599 | 6702 | ENSG00000129514 | forkhead box A1<br>[Source:HGNC<br>Symbol;Acc:HGNC:5021]                                     |
| GLIS2   | 27793826 | 27793851 | 6678 | 6703 | ENSG00000274636 | GLIS family zinc finger 2<br>[Source:HGNC<br>Symbol;Acc:HGNC:29450]                          |
| VEZF1   | 27793818 | 27793865 | 6664 | 6711 | ENSG00000136451 | vascular endothelial zinc<br>finger 1 [Source:HGNC<br>Symbol;Acc:HGNC:12949]                 |
| L3MBTL2 | 27793815 | 27793894 | 6635 | 6714 | ENSG00000100395 | L3MBTL histone methyl-<br>lysine binding protein 2<br>[Source:HGNC<br>Symbol;Acc:HGNC:18594] |
| EGR2    | 27793815 | 27793880 | 6649 | 6714 | ENSG00000122877 | early growth response 2<br>[Source:HGNC<br>Symbol;Acc:HGNC:3239]                             |
| ZNF76   | 27793812 | 27793885 | 6644 | 6717 | ENSG00000065029 | zinc finger protein 76<br>[Source:HGNC<br>Symbol;Acc:HGNC:13149]                             |
| NFYA    | 27793807 | 27793886 | 6643 | 6722 | ENSG00000001167 | nuclear transcription factor<br>Y subunit alpha                                              |

|        |          |          |      |      |                 |                                                                                                |
|--------|----------|----------|------|------|-----------------|------------------------------------------------------------------------------------------------|
|        |          |          |      |      |                 | [Source:HGNC<br>Symbol;Acc:HGNC:7804]                                                          |
| ZFP64  | 27793801 | 27793870 | 6659 | 6728 | ENSG00000020256 | ZFP64 Zinc Finger Protein                                                                      |
| EGR1   | 27793801 | 27793896 | 6633 | 6728 | ENSG00000120738 | early growth response 1<br>[Source:HGNC<br>Symbol;Acc:HGNC:3238]                               |
| ZBTB48 | 27793798 | 27793843 | 6686 | 6731 | ENSG00000204859 | zinc finger and BTB<br>domain containing 48<br>[Source:HGNC<br>Symbol;Acc:HGNC:4930]           |
| SUZ12  | 27793794 | 27793869 | 6660 | 6735 | ENSG00000178691 | SUZ12 polycomb<br>repressive complex 2<br>subunit [Source:HGNC<br>Symbol;Acc:HGNC:17101]       |
| PGR    | 27793792 | 27793889 | 6640 | 6737 | ENSG00000082175 | progesterone receptor<br>[Source:HGNC<br>Symbol;Acc:HGNC:8910]                                 |
| TRIM24 | 27793792 | 27793888 | 6641 | 6737 | ENSG00000122779 | tripartite motif containing<br>24 [Source:HGNC<br>Symbol;Acc:HGNC:11812]                       |
| NR2F2  | 27793790 | 27793869 | 6660 | 6739 | ENSG00000185551 | nuclear receptor subfamily<br>2 group F member 2<br>[Source:HGNC<br>Symbol;Acc:HGNC:7976]      |
| ARNTL  | 27793787 | 27793862 | 6667 | 6742 | ENSG00000133794 | aryl hydrocarbon receptor<br>nuclear translocator like<br>[Source:HGNC<br>Symbol;Acc:HGNC:701] |
| POU5F1 | 27793783 | 27793874 | 6655 | 6746 | ENSG00000206454 | POU class 5 homeobox 1<br>[Source:HGNC<br>Symbol;Acc:HGNC:9221]                                |

|       |          |          |      |      |                 |                                                                                                                          |
|-------|----------|----------|------|------|-----------------|--------------------------------------------------------------------------------------------------------------------------|
| EP300 | 27793780 | 27793879 | 6650 | 6749 | ENSG00000100393 | E1A binding protein p300<br>[Source:HGNC<br>Symbol;Acc:HGNC:3373]                                                        |
| XRCC5 | 27793776 | 27793797 | 6732 | 6753 | ENSG00000079246 | X-ray repair cross<br>complementing 5<br>[Source:HGNC<br>Symbol;Acc:HGNC:12833]                                          |
| SS18  | 27793775 | 27793868 | 6661 | 6754 | ENSG00000141380 | SS18 subunit of BAF<br>chromatin remodeling<br>complex [Source:HGNC<br>Symbol;Acc:HGNC:11340]                            |
| FEZF1 | 27793774 | 27793837 | 6692 | 6755 | ENSG00000128610 | FEZ family zinc finger 1<br>[Source:HGNC<br>Symbol;Acc:HGNC:22788]                                                       |
| RBBP5 | 27793769 | 27793862 | 6667 | 6760 | ENSG00000117222 | RB binding protein 5,<br>histone lysine<br>methyltransferase<br>complex subunit<br>[Source:HGNC<br>Symbol;Acc:HGNC:9888] |
| ELF1  | 27793767 | 27793844 | 6685 | 6762 | ENSG00000120690 | E74 like ETS transcription<br>factor 1 [Source:HGNC<br>Symbol;Acc:HGNC:3316]                                             |
| FGFR1 | 27793763 | 27793838 | 6691 | 6766 | ENSG00000077782 | fibroblast growth factor<br>receptor 1 [Source:HGNC<br>Symbol;Acc:HGNC:3688]                                             |
| KDM2B | 27793762 | 27793847 | 6682 | 6767 | ENSG00000089094 | lysine demethylase 2B<br>[Source:HGNC<br>Symbol;Acc:HGNC:13610]                                                          |

|       |          |          |      |      |                 |                                                                                |
|-------|----------|----------|------|------|-----------------|--------------------------------------------------------------------------------|
| GLIS1 | 27793762 | 27793855 | 6674 | 6767 | ENSG00000174332 | GLIS family zinc finger 1<br>[Source:HGNC<br>Symbol;Acc:HGNC:29525]            |
| RARA  | 27793761 | 27793856 | 6673 | 6768 | ENSG00000131759 | retinoic acid receptor<br>alpha [Source:HGNC<br>Symbol;Acc:HGNC:9864]          |
| EGR2  | 27793758 | 27793823 | 6706 | 6771 | ENSG00000122877 | early growth response 2<br>[Source:HGNC<br>Symbol;Acc:HGNC:3239]               |
| AGO1  | 27793755 | 27793776 | 6753 | 6774 | ENSG00000092847 | argonaute RISC<br>component 1<br>[Source:HGNC<br>Symbol;Acc:HGNC:3262]         |
| PDX1  | 27793755 | 27793826 | 6703 | 6774 | ENSG00000139515 | pancreatic and duodenal<br>homeobox 1<br>[Source:HGNC<br>Symbol;Acc:HGNC:6107] |
| ERG   | 27793754 | 27793834 | 6695 | 6775 | ENSG00000157554 | ETS transcription factor<br>ERG [Source:HGNC<br>Symbol;Acc:HGNC:3446]          |
| MAZ   | 27793750 | 27793837 | 6692 | 6779 | ENSG00000103495 | MYC associated zinc<br>finger protein<br>[Source:HGNC<br>Symbol;Acc:HGNC:6914] |
| KLF9  | 27793749 | 27793820 | 6709 | 6780 | ENSG00000119138 | Kruppel like factor 9<br>[Source:HGNC<br>Symbol;Acc:HGNC:1123]                 |
| ZFX2  | 27793749 | 27793882 | 6647 | 6780 | ENSG00000136367 | zinc finger homeobox 2<br>[Source:HGNC<br>Symbol;Acc:HGNC:20152]               |

|             |          |          |      |      |                 |                                                                                                          |
|-------------|----------|----------|------|------|-----------------|----------------------------------------------------------------------------------------------------------|
| HNRNPLL     | 27793749 | 27793814 | 6715 | 6780 | ENSG00000143889 | heterogeneous nuclear ribonucleoprotein L like<br>[Source:HGNC Symbol;Acc:HGNC:25127]                    |
| TAL1        | 27793749 | 27793816 | 6713 | 6780 | ENSG00000162367 | TAL bHLH transcription factor 1, erythroid differentiation factor<br>[Source:HGNC Symbol;Acc:HGNC:11556] |
| TCF7L1/LEF1 | 27793746 | 27793823 | 6706 | 6783 | ENSG00000152284 | transcription factor 7 like 1<br>[Source:HGNC Symbol;Acc:HGNC:11640]                                     |
| FLI1        | 27793734 | 27793825 | 6704 | 6795 | ENSG00000151702 | Fli-1 proto-oncogene, ETS transcription factor<br>[Source:HGNC Symbol;Acc:HGNC:3749]                     |
| SP4         | 27793732 | 27793811 | 6718 | 6797 | ENSG00000105866 | Sp4 transcription factor<br>[Source:HGNC Symbol;Acc:HGNC:11209]                                          |
| SP2         | 27793732 | 27793809 | 6720 | 6797 | ENSG00000167182 | Sp2 transcription factor<br>[Source:HGNC Symbol;Acc:HGNC:11207]                                          |
| SP1         | 27793732 | 27793819 | 6710 | 6797 | ENSG00000185591 | Sp1 transcription factor<br>[Source:HGNC Symbol;Acc:HGNC:11205]                                          |
| TFAP4       | 27793731 | 27793796 | 6733 | 6798 | ENSG00000090447 | transcription factor AP-4<br>[Source:HGNC Symbol;Acc:HGNC:11745]                                         |
| PGR         | 27793730 | 27793821 | 6708 | 6799 | ENSG00000082175 | progesterone receptor<br>[Source:HGNC Symbol;Acc:HGNC:8910]                                              |



|        |          |          |      |      |                 |                                                                                 |
|--------|----------|----------|------|------|-----------------|---------------------------------------------------------------------------------|
| HIF1A  | 27793729 | 27793812 | 6717 | 6800 | ENSG00000100644 | hypoxia inducible factor 1 subunit alpha<br>[Source:HGNC Symbol;Acc:HGNC:4910]  |
| CCNT2  | 27793728 | 27793881 | 6648 | 6801 | ENSG00000082258 | cyclin T2 [Source:HGNC Symbol;Acc:HGNC:1600]                                    |
| SMC1A  | 27793727 | 27793820 | 6709 | 6802 | ENSG00000072501 | structural maintenance of chromosomes 1A<br>[Source:HGNC Symbol;Acc:HGNC:11111] |
| ZNF554 | 27793726 | 27793751 | 6778 | 6803 | ENSG00000172006 | zinc finger protein 554<br>[Source:HGNC Symbol;Acc:HGNC:26629]                  |
| HEXIM1 | 27793726 | 27793747 | 6782 | 6803 | ENSG00000186834 | HEXIM P-TEFb complex subunit 1 [Source:HGNC Symbol;Acc:HGNC:24953]              |
| RUNX1  | 27793725 | 27793785 | 6744 | 6804 | ENSG00000159216 | RUNX family transcription factor 1 [Source:HGNC Symbol;Acc:HGNC:10471]          |
| ZBTB14 | 27793725 | 27793738 | 6791 | 6804 | ENSG00000198081 | zinc finger and BTB domain containing 14<br>[Source:HGNC Symbol;Acc:HGNC:12860] |
| OTX2   | 27793722 | 27793823 | 6706 | 6807 | ENSG00000165588 | orthodenticle homeobox 2<br>[Source:HGNC Symbol;Acc:HGNC:8522]                  |
| AR     | 27793722 | 27793784 | 6745 | 6807 | ENSG00000169083 | androgen receptor<br>[Source:HGNC Symbol;Acc:HGNC:644]                          |

|         |          |          |      |      |                 |                                                                                                                                                      |
|---------|----------|----------|------|------|-----------------|------------------------------------------------------------------------------------------------------------------------------------------------------|
| EGR3    | 27793722 | 27793849 | 6680 | 6807 | ENSG00000179388 | early growth response 3<br>[Source:HGNC<br>Symbol;Acc:HGNC:3240]                                                                                     |
| E2F1    | 27793721 | 27793760 | 6769 | 6808 | ENSG00000101412 | E2F transcription factor 1<br>[Source:HGNC<br>Symbol;Acc:HGNC:3113]                                                                                  |
| SMARCA4 | 27793721 | 27793830 | 6699 | 6808 | ENSG00000127616 | SWI/SNF related, matrix<br>associated, actin<br>dependent regulator of<br>chromatin, subfamily a,<br>member 4 [Source:HGNC<br>Symbol;Acc:HGNC:11100] |
| UPF1    | 27793719 | 27793820 | 6709 | 6810 | ENSG00000005007 | UPF1 RNA helicase and<br>ATPase [Source:HGNC<br>Symbol;Acc:HGNC:9962]                                                                                |
| PCBP1   | 27793719 | 27793786 | 6743 | 6810 | ENSG00000169564 | poly(rC) binding protein 1<br>[Source:HGNC<br>Symbol;Acc:HGNC:8647]                                                                                  |
| ZBTB26  | 27793719 | 27793806 | 6723 | 6810 | ENSG00000171448 | zinc finger and BTB<br>domain containing 26<br>[Source:HGNC<br>Symbol;Acc:HGNC:23383]                                                                |
| FOXA1   | 27793718 | 27793801 | 6728 | 6811 | ENSG00000129514 | forkhead box A1<br>[Source:HGNC<br>Symbol;Acc:HGNC:5021]                                                                                             |
| CDX2    | 27793718 | 27793803 | 6726 | 6811 | ENSG00000165556 | caudal type homeobox 2<br>[Source:HGNC<br>Symbol;Acc:HGNC:1806]                                                                                      |
| MYCN    | 27793714 | 27793749 | 6780 | 6815 | ENSG00000134323 | MYCN proto-oncogene,<br>bHLH transcription factor                                                                                                    |

|       |          |          |      |      |                 |                                                                                           |
|-------|----------|----------|------|------|-----------------|-------------------------------------------------------------------------------------------|
|       |          |          |      |      |                 | [Source:HGNC<br>Symbol;Acc:HGNC:7559]                                                     |
| CTCF  | 27793712 | 27793759 | 6770 | 6817 | ENSG00000102974 | CCCTC-binding factor<br>[Source:HGNC<br>Symbol;Acc:HGNC:13723]                            |
| USP7  | 27793708 | 27793783 | 6746 | 6821 | ENSG00000187555 | ubiquitin specific<br>peptidase 7<br>[Source:HGNC<br>Symbol;Acc:HGNC:12630]               |
| CNOT3 | 27793706 | 27793787 | 6742 | 6823 | ENSG00000276082 | CCR4-NOT transcription<br>complex subunit 3<br>[Source:HGNC<br>Symbol;Acc:HGNC:7879]      |
| GATA6 | 27793705 | 27793802 | 6727 | 6824 | ENSG00000141448 | GATA binding protein 6<br>[Source:HGNC<br>Symbol;Acc:HGNC:4174]                           |
| MYC   | 27793701 | 27793746 | 6783 | 6828 | ENSG00000136997 | MYC proto-oncogene,<br>bHLH transcription factor<br>[Source:HGNC<br>Symbol;Acc:HGNC:7553] |
| CHD7  | 27793701 | 27793792 | 6737 | 6828 | ENSG00000171316 | chromodomain helicase<br>DNA binding protein 7<br>[Source:HGNC<br>Symbol;Acc:HGNC:20626]  |
| EP300 | 27793699 | 27793800 | 6729 | 6830 | ENSG00000100393 | E1A binding protein p300<br>[Source:HGNC<br>Symbol;Acc:HGNC:3373]                         |
| SMAD3 | 27793699 | 27793782 | 6747 | 6830 | ENSG00000166949 | SMAD family member 3<br>[Source:HGNC<br>Symbol;Acc:HGNC:6769]                             |

|         |          |          |      |      |                 |                                                                                                                                                    |
|---------|----------|----------|------|------|-----------------|----------------------------------------------------------------------------------------------------------------------------------------------------|
| RUNX1   | 27793698 | 27793799 | 6730 | 6831 | ENSG00000159216 | RUNX Family<br>Transcription Factor 1                                                                                                              |
| TEAD4   | 27793695 | 27793806 | 6723 | 6834 | ENSG00000197905 | TEA domain transcription<br>factor 4 [Source:HGNC<br>Symbol;Acc:HGNC:11717]                                                                        |
| SMARCC1 | 27793692 | 27793749 | 6780 | 6837 | ENSG00000173473 | SWI/SNF related, matrix<br>associated, actin<br>dependent regulator of<br>chromatin subfamily c<br>member 1 [Source:HGNC<br>Symbol;Acc:HGNC:11104] |
| TFAP2C  | 27793691 | 27793789 | 6740 | 6838 | ENSG00000087510 | transcription factor AP-2<br>gamma [Source:HGNC<br>Symbol;Acc:HGNC:11744]                                                                          |
| GATA1   | 27793691 | 27793769 | 6760 | 6838 | ENSG00000102145 | GATA binding protein 1<br>[Source:HGNC<br>Symbol;Acc:HGNC:4170]                                                                                    |
| GABPB1  | 27793690 | 27793769 | 6760 | 6839 | ENSG00000104064 | GA binding protein<br>transcription factor subunit<br>beta 1 [Source:HGNC<br>Symbol;Acc:HGNC:4074]                                                 |
| FOXA2   | 27793690 | 27793786 | 6743 | 6839 | ENSG00000125798 | forkhead box A2<br>[Source:HGNC<br>Symbol;Acc:HGNC:5022]                                                                                           |
| PTEN    | 27793690 | 27793775 | 6754 | 6839 | ENSG00000171862 | phosphatase and tensin<br>homolog [Source:HGNC<br>Symbol;Acc:HGNC:9588]                                                                            |
| RAD21   | 27793688 | 27793760 | 6769 | 6841 | ENSG00000164754 | RAD21 cohesin complex<br>component<br>[Source:HGNC<br>Symbol;Acc:HGNC:9811]                                                                        |

|        |          |          |      |      |                 |                                                                                                                          |
|--------|----------|----------|------|------|-----------------|--------------------------------------------------------------------------------------------------------------------------|
| YY1    | 27793686 | 27793795 | 6734 | 6843 | ENSG00000100811 | YY1 transcription factor<br>[Source:HGNC<br>Symbol;Acc:HGNC:12856]                                                       |
| ZNF35  | 27793685 | 27793786 | 6743 | 6844 | ENSG00000281306 | zinc finger protein 35<br>[Source:HGNC<br>Symbol;Acc:HGNC:13099]                                                         |
| PAX5   | 27793683 | 27793780 | 6749 | 6846 | ENSG00000196092 | paired box 5<br>[Source:HGNC<br>Symbol;Acc:HGNC:8619]                                                                    |
| JUND   | 27793682 | 27793743 | 6786 | 6847 | ENSG00000130522 | JunD proto-oncogene,<br>AP-1 transcription factor<br>subunit [Source:HGNC<br>Symbol;Acc:HGNC:6206]                       |
| PDX1   | 27793682 | 27793745 | 6784 | 6847 | ENSG00000139515 | pancreatic and duodenal<br>homeobox 1<br>[Source:HGNC<br>Symbol;Acc:HGNC:6107]                                           |
| HSF1   | 27793682 | 27793771 | 6758 | 6847 | ENSG00000284774 | heat shock transcription<br>factor 1 [Source:HGNC<br>Symbol;Acc:HGNC:5224]                                               |
| NCAPH2 | 27793681 | 27793766 | 6763 | 6848 | ENSG00000025770 | non-SMC condensin II<br>complex subunit H2<br>[Source:HGNC<br>Symbol;Acc:HGNC:25071]                                     |
| JMJD6  | 27793681 | 27793768 | 6761 | 6848 | ENSG00000070495 | jumonji domain containing<br>6, arginine demethylase<br>and lysine hydroxylase<br>[Source:HGNC<br>Symbol;Acc:HGNC:19355] |

|       |          |          |      |      |                 |                                                                                                |
|-------|----------|----------|------|------|-----------------|------------------------------------------------------------------------------------------------|
| NRF1  | 27793681 | 27793781 | 6748 | 6848 | ENSG00000106459 | nuclear respiratory factor<br>1 [Source:HGNC<br>Symbol;Acc:HGNC:7996]                          |
| SRF   | 27793681 | 27793760 | 6769 | 6848 | ENSG00000112658 | serum response factor<br>[Source:HGNC<br>Symbol;Acc:HGNC:11291]                                |
| PRDM9 | 27793681 | 27793752 | 6777 | 6848 | ENSG00000164256 | PR/SET domain 9<br>[Source:HGNC<br>Symbol;Acc:HGNC:13994]                                      |
| CASZ1 | 27793679 | 27793772 | 6757 | 6850 | ENSG00000130940 | castor zinc finger 1<br>[Source:HGNC<br>Symbol;Acc:HGNC:26002]                                 |
| GATA2 | 27793679 | 27793756 | 6773 | 6850 | ENSG00000179348 | GATA binding protein 2<br>[Source:HGNC<br>Symbol;Acc:HGNC:4171]                                |
| NCOR1 | 27793674 | 27793759 | 6770 | 6855 | ENSG00000141027 | nuclear receptor<br>corepressor 1<br>[Source:HGNC<br>Symbol;Acc:HGNC:7672]                     |
| PIAS1 | 27793669 | 27793744 | 6785 | 6860 | ENSG00000033800 | protein inhibitor of<br>activated STAT 1<br>[Source:HGNC<br>Symbol;Acc:HGNC:2752]              |
| ARNTL | 27793668 | 27793765 | 6764 | 6861 | ENSG00000133794 | aryl hydrocarbon receptor<br>nuclear translocator like<br>[Source:HGNC<br>Symbol;Acc:HGNC:701] |
| ESR1  | 27793666 | 27793765 | 6764 | 6863 | ENSG00000091831 | estrogen receptor 1<br>[Source:HGNC<br>Symbol;Acc:HGNC:3467]                                   |

|        |          |          |      |      |                 |                                                                                                          |
|--------|----------|----------|------|------|-----------------|----------------------------------------------------------------------------------------------------------|
| RXRA   | 27793665 | 27793754 | 6775 | 6864 | ENSG00000186350 | retinoid X receptor alpha<br>[Source:HGNC<br>Symbol;Acc:HGNC:10477]                                      |
| BRD4   | 27793664 | 27793773 | 6756 | 6865 | ENSG00000141867 | bromodomain containing 4<br>[Source:HGNC<br>Symbol;Acc:HGNC:13575]                                       |
| AFF1   | 27793664 | 27793739 | 6790 | 6865 | ENSG00000172493 | AF4/FMR2 family member<br>1 [Source:HGNC<br>Symbol;Acc:HGNC:7135]                                        |
| CXXC4  | 27793663 | 27793764 | 6765 | 6866 | ENSG00000168772 | CXXC Finger Protein 4                                                                                    |
| TRPS1  | 27793662 | 27793753 | 6776 | 6867 | ENSG00000104447 | transcriptional repressor<br>GATA binding 1<br>[Source:HGNC<br>Symbol;Acc:HGNC:12340]                    |
| GABPA  | 27793660 | 27793759 | 6770 | 6869 | ENSG00000154727 | GA binding protein<br>transcription factor subunit<br>alpha [Source:HGNC<br>Symbol;Acc:HGNC:4071]        |
| ZBTB7A | 27793660 | 27793747 | 6782 | 6869 | ENSG00000178951 | zinc finger and BTB<br>domain containing 7A<br>[Source:HGNC<br>Symbol;Acc:HGNC:18078]                    |
| EZH2   | 27793659 | 27793758 | 6771 | 6870 | ENSG00000106462 | enhancer of zeste 2<br>polycomb repressive<br>complex 2 subunit<br>[Source:HGNC<br>Symbol;Acc:HGNC:3527] |
| POU5F1 | 27793657 | 27793748 | 6781 | 6872 | ENSG00000206454 | POU class 5 homeobox 1<br>[Source:HGNC<br>Symbol;Acc:HGNC:9221]                                          |

|       |          |          |      |      |                 |                                                                                                |
|-------|----------|----------|------|------|-----------------|------------------------------------------------------------------------------------------------|
| SP1   | 27793656 | 27793763 | 6766 | 6873 | ENSG00000185591 | Sp1 transcription factor<br>[Source:HGNC<br>Symbol;Acc:HGNC:11205]                             |
| HDAC2 | 27793656 | 27793761 | 6768 | 6873 | ENSG00000196591 | histone deacetylase 2<br>[Source:HGNC<br>Symbol;Acc:HGNC:4853]                                 |
| ELF1  | 27793654 | 27793743 | 6786 | 6875 | ENSG00000120690 | E74 like ETS transcription<br>factor 1 [Source:HGNC<br>Symbol;Acc:HGNC:3316]                   |
| SIRT6 | 27793651 | 27793744 | 6785 | 6878 | ENSG00000077463 | sirtuin 6 [Source:HGNC<br>Symbol;Acc:HGNC:14934]                                               |
| LARP7 | 27793651 | 27793752 | 6777 | 6878 | ENSG00000174720 | La ribonucleoprotein 7,<br>transcriptional regulator<br>[Source:HGNC<br>Symbol;Acc:HGNC:24912] |
| KLF5  | 27793647 | 27793740 | 6789 | 6882 | ENSG00000102554 | Kruppel like factor 5<br>[Source:HGNC<br>Symbol;Acc:HGNC:6349]                                 |
| AFF4  | 27793646 | 27793739 | 6790 | 6883 | ENSG00000072364 | AF4/FMR2 family member<br>4 [Source:HGNC<br>Symbol;Acc:HGNC:17869]                             |
| SUZ12 | 27793643 | 27793748 | 6781 | 6886 | ENSG00000178691 | SUZ12 polycomb<br>repressive complex 2<br>subunit [Source:HGNC<br>Symbol;Acc:HGNC:17101]       |

**Table S1: Transcription factor identified for binding to the putative human NOS2-2 promoter**

Listed the names of the transcription factors (TF), which have been identified by ChIP-assays (analysis using BioUML [1]) to interact with the putative NOS2-2 promoter sequence



(between exon 2 and exon 1-diff in the human NOS2 gene). Shown are the transcription factor title, the start and end of the CHIP Fragment on chromosome 17 (**Ch17**) and relative to the start of the NOS2 gene (**G**), the ENSEMBL gene ID and a short description of the TF.

| Name Transcript | Gene stable ID  | Gene description                                                                                  | comment |
|-----------------|-----------------|---------------------------------------------------------------------------------------------------|---------|
| AASS_2          | ENSG00000008311 | aminoadipate-semialdehyde synthase [Source:HGNC Symbol;Acc:HGNC:17366]                            |         |
| ACAP1_1         | ENSG00000072818 | ArfGAP with coiled-coil, ankyrin repeat and PH domains 1 [Source:HGNC Symbol;Acc:HGNC:16467]      |         |
| AKAP1_2         | ENSG00000121057 | A-kinase anchoring protein 1 [Source:HGNC Symbol;Acc:HGNC:367]                                    | RNABP   |
| ARL4C_1         | ENSG00000188042 | ADP ribosylation factor like GTPase 4C [Source:HGNC Symbol;Acc:HGNC:698]                          |         |
| B3GNT7_1        | ENSG00000156966 | UDP-GlcNAc:betaGal beta-1,3-N-acetylglucosaminyltransferase 7 [Source:HGNC Symbol;Acc:HGNC:18811] |         |
| BMI1_1          | ENSG00000168283 | BMI1 proto-oncogene, polycomb ring finger [Source:HGNC Symbol;Acc:HGNC:1066]                      | TF      |
| BMP5_1          | ENSG00000112175 | bone morphogenetic protein 5 [Source:HGNC Symbol;Acc:HGNC:1072]                                   |         |

|           |                 |                                                                                                   |       |
|-----------|-----------------|---------------------------------------------------------------------------------------------------|-------|
| CARNMT1_1 | ENSG00000156017 | carnosine N-methyltransferase 1<br>[Source:HGNC<br>Symbol;Acc:HGNC:23435]                         |       |
| CCDC92_5  | ENSG00000119242 | coiled-coil domain containing 92 [Source:HGNC<br>Symbol;Acc:HGNC:29563]                           |       |
| CEBPZ_1   | ENSG00000115816 | CCAAT enhancer binding protein zeta [Source:HGNC<br>Symbol;Acc:HGNC:24218]                        | RNABP |
| CHCHD3_1  | ENSG00000106554 | coiled-coil-helix-coiled-coil-helix domain containing 3<br>[Source:HGNC<br>Symbol;Acc:HGNC:21906] |       |
| CHST4_2   | ENSG00000140835 | carbohydrate sulfotransferase 4 [Source:HGNC<br>Symbol;Acc:HGNC:1972]                             |       |
| CLDN10_2  | ENSG00000134873 | claudin 10 [Source:HGNC<br>Symbol;Acc:HGNC:2033]                                                  |       |
| CNMD_2    | ENSG00000136110 | chondromodulin<br>[Source:HGNC<br>Symbol;Acc:HGNC:17005]                                          |       |
| CYP2S1_2  | ENSG00000167600 | cytochrome P450 family 2 subfamily S member 1<br>[Source:HGNC<br>Symbol;Acc:HGNC:15654]           |       |
| DNMT3B_1  | ENSG00000088305 | DNA methyltransferase 3 beta<br>[Source:HGNC<br>Symbol;Acc:HGNC:2979]                             | RNABP |
| DSCC1_1   | ENSG00000136982 | DNA replication and sister chromatid cohesion 1                                                   |       |

|              |                 |                                                                                                        |       |
|--------------|-----------------|--------------------------------------------------------------------------------------------------------|-------|
|              |                 | [Source:HGNC<br>Symbol;Acc:HGNC:24453]                                                                 |       |
| EFNB1_1      | ENSG00000090776 | ephrin B1 [Source:HGNC<br>Symbol;Acc:HGNC:3226]                                                        |       |
| EIF2AK4_1    | ENSG00000128829 | eukaryotic translation initiation<br>factor 2 alpha kinase 4<br>[Source:HGNC<br>Symbol;Acc:HGNC:19687] | RNABP |
| EIF5A_8      | ENSG00000132507 | eukaryotic translation initiation<br>factor 5A [Source:HGNC<br>Symbol;Acc:HGNC:3300]                   | RNABP |
| ENOPH1_1     | ENSG00000145293 | enolase-phosphatase 1<br>[Source:HGNC<br>Symbol;Acc:HGNC:24599]                                        |       |
| FAM160A1_1   | ENSG00000164142 | family with sequence<br>similarity 160 member A1<br>[Source:HGNC<br>Symbol;Acc:HGNC:34237]             |       |
| FBN2_1       | ENSG00000138829 | fibrillin 2 [Source:HGNC<br>Symbol;Acc:HGNC:3604]                                                      |       |
| FKBP4_1      | ENSG00000004478 | FKBP prolyl isomerase 4<br>[Source:HGNC<br>Symbol;Acc:HGNC:3720]                                       |       |
| GABRB3_7     | ENSG00000166206 | gamma-aminobutyric acid<br>type A receptor subunit beta3<br>[Source:HGNC<br>Symbol;Acc:HGNC:4083]      |       |
| GADD45GIP1_1 | ENSG00000179271 | GADD45G interacting protein<br>1 [Source:HGNC<br>Symbol;Acc:HGNC:29996]                                |       |

|          |                 |                                                                                                 |       |
|----------|-----------------|-------------------------------------------------------------------------------------------------|-------|
| GLB1L3_1 | ENSG00000166105 | galactosidase beta 1 like 3<br>[Source:HGNC<br>Symbol;Acc:HGNC:25147]                           |       |
| GNL2_2   | ENSG00000134697 | G protein nucleolar 2<br>[Source:HGNC<br>Symbol;Acc:HGNC:29925]                                 | RNABP |
| GPR176_1 | ENSG00000166073 | G protein-coupled receptor<br>176 [Source:HGNC<br>Symbol;Acc:HGNC:32370]                        |       |
| HGSNAT_1 | ENSG00000165102 | heparan-alpha-glucosaminide<br>N-acetyltransferase<br>[Source:HGNC<br>Symbol;Acc:HGNC:26527]    |       |
| HSPE1_4  | ENSG00000115541 | heat shock protein family E<br>(Hsp10) member 1<br>[Source:HGNC<br>Symbol;Acc:HGNC:5269]        |       |
| IER5L_1  | ENSG00000188483 | immediate early response 5<br>like [Source:HGNC<br>Symbol;Acc:HGNC:23679]                       |       |
| INTS13_2 | ENSG00000064102 | integrator complex subunit 13<br>[Source:HGNC<br>Symbol;Acc:HGNC:20174]                         |       |
| JARID2_1 | ENSG00000008083 | jumonji and AT-rich<br>interaction domain containing<br>2 [Source:HGNC<br>Symbol;Acc:HGNC:6196] | TF    |
| KIF1A_1  | ENSG00000130294 | kinesin family member 1A<br>[Source:HGNC<br>Symbol;Acc:HGNC:888]                                |       |

|           |                 |                                                                                             |                     |
|-----------|-----------------|---------------------------------------------------------------------------------------------|---------------------|
| L1TD1_1   | ENSG00000240563 | LINE1 type transposase domain containing 1<br>[Source:HGNC<br>Symbol;Acc:HGNC:25595]        | RNABP               |
| LEF1_1    | ENSG00000138795 | lymphoid enhancer binding factor 1 [Source:HGNC<br>Symbol;Acc:HGNC:6551]                    | TF (Syn: TCF1/7/10) |
| LEFTY1_1  | ENSG00000243709 | left-right determination factor 1 [Source:HGNC<br>Symbol;Acc:HGNC:6552]                     |                     |
| LIX1_1    | ENSG00000145721 | limb and CNS expressed 1<br>[Source:HGNC<br>Symbol;Acc:HGNC:18581]                          |                     |
| LRP2_1    | ENSG00000081479 | LDL receptor related protein 2<br>[Source:HGNC<br>Symbol;Acc:HGNC:6694]                     |                     |
| LRP2_6    | ENSG00000081479 | LDL receptor related protein 2<br>[Source:HGNC<br>Symbol;Acc:HGNC:6694]                     |                     |
| MAL2_3    | ENSG00000147676 | mal, T cell differentiation protein 2 [Source:HGNC<br>Symbol;Acc:HGNC:13634]                |                     |
| MAP3K21_1 | ENSG00000143674 | mitogen-activated protein kinase kinase kinase 21<br>[Source:HGNC<br>Symbol;Acc:HGNC:29798] |                     |
| MEIS1_2   | ENSG00000143995 | Meis homeobox 1<br>[Source:HGNC<br>Symbol;Acc:HGNC:7000]                                    | TF                  |

|           |                 |                                                                                        |       |
|-----------|-----------------|----------------------------------------------------------------------------------------|-------|
| MSH2_7    | ENSG00000095002 | mutS homolog 2<br>[Source:HGNC<br>Symbol;Acc:HGNC:7325]                                |       |
| NANOG_2   | ENSG00000111704 | Nanog homeobox<br>[Source:HGNC<br>Symbol;Acc:HGNC:20857]                               | TF    |
| NBPF1_1   | ENSG00000219481 | NBPF member 1<br>[Source:HGNC<br>Symbol;Acc:HGNC:26088]                                |       |
| NCOA6_6   | ENSG00000198646 | nuclear receptor coactivator 6<br>[Source:HGNC<br>Symbol;Acc:HGNC:15936]               |       |
| NDUFAB1_2 | ENSG00000004779 | NADH:ubiquinone<br>oxidoreductase subunit AB1<br>[Source:HGNC<br>Symbol;Acc:HGNC:7694] |       |
| NLGN4X_3  | ENSG00000146938 | neuroligin 4 X-linked<br>[Source:HGNC<br>Symbol;Acc:HGNC:14287]                        |       |
| NLN_1     | ENSG00000123213 | neurolysin [Source:HGNC<br>Symbol;Acc:HGNC:16058]                                      |       |
| NOCT_1    | ENSG00000151014 | nocturnin [Source:HGNC<br>Symbol;Acc:HGNC:14254]                                       | RNABP |
| NOS2_2    | ENSG00000007171 | nitric oxide synthase 2<br>[Source:HGNC<br>Symbol;Acc:HGNC:7873]                       |       |
| P2RY1_1   | ENSG00000169860 | purinergic receptor P2Y1<br>[Source:HGNC<br>Symbol;Acc:HGNC:8539]                      |       |
| PCNX2_1   | ENSG00000135749 | pecanex 2 [Source:HGNC<br>Symbol;Acc:HGNC:8736]                                        |       |

|          |                 |                                                                                                |    |
|----------|-----------------|------------------------------------------------------------------------------------------------|----|
| PDZD4_3  | ENSG00000067840 | PDZ domain containing 4<br>[Source:HGNC<br>Symbol;Acc:HGNC:21167]                              |    |
| PHC2_3   | ENSG00000134686 | polyhomeotic homolog 2<br>[Source:HGNC<br>Symbol;Acc:HGNC:3183]                                |    |
| PIM2_1   | ENSG00000102096 | Pim-2 proto-oncogene,<br>serine/threonine kinase<br>[Source:HGNC<br>Symbol;Acc:HGNC:8987]      |    |
| PIPOX_6  | ENSG00000179761 | pipecolic acid and sarcosine<br>oxidase [Source:HGNC<br>Symbol;Acc:HGNC:17804]                 |    |
| PLAGL1_4 | ENSG00000118495 | PLAG1 like zinc finger 1<br>[Source:HGNC<br>Symbol;Acc:HGNC:9046]                              | TF |
| PLPP2_3  | ENSG00000141934 | phospholipid phosphatase 2<br>[Source:HGNC<br>Symbol;Acc:HGNC:9230]                            |    |
| PMAIP1_1 | ENSG00000141682 | phorbol-12-myristate-13-<br>acetate-induced protein 1<br>[Source:HGNC<br>Symbol;Acc:HGNC:9108] |    |
| PODXL_2  | ENSG00000128567 | podocalyxin like<br>[Source:HGNC<br>Symbol;Acc:HGNC:9171]                                      |    |
| POLR1F_1 | ENSG00000105849 | RNA polymerase I subunit F<br>[Source:HGNC<br>Symbol;Acc:HGNC:18027]                           |    |

|            |                 |                                                                                              |                 |
|------------|-----------------|----------------------------------------------------------------------------------------------|-----------------|
| POU5F1_1   | ENSG00000204531 | POU class 5 homeobox 1<br>[Source:HGNC<br>Symbol;Acc:HGNC:9221]                              | TF (Syn:OCT3/4) |
| PPAT_1     | ENSG00000128059 | phosphoribosyl<br>pyrophosphate<br>amidotransferase<br>[Source:HGNC<br>Symbol;Acc:HGNC:9238] |                 |
| PPP1R16B_1 | ENSG00000101445 | protein phosphatase 1<br>regulatory subunit 16B<br>[Source:HGNC<br>Symbol;Acc:HGNC:15850]    |                 |
| PRDM14_1   | ENSG00000147596 | PR/SET domain 14<br>[Source:HGNC<br>Symbol;Acc:HGNC:14001]                                   | TF              |
| PRIM2_5    | ENSG00000146143 | DNA primase subunit 2<br>[Source:HGNC<br>Symbol;Acc:HGNC:9370]                               |                 |
| PRKCI_1    | ENSG00000163558 | protein kinase C iota<br>[Source:HGNC<br>Symbol;Acc:HGNC:9404]                               |                 |
| PRTG_1     | ENSG00000166450 | protogenin [Source:HGNC<br>Symbol;Acc:HGNC:26373]                                            |                 |
| PTMA_5     | ENSG00000187514 | prothymosin alpha<br>[Source:HGNC<br>Symbol;Acc:HGNC:9623]                                   |                 |
| RAI1_1     | ENSG00000108557 | retinoic acid induced 1<br>[Source:HGNC<br>Symbol;Acc:HGNC:9834]                             |                 |
| RCC2_1     | ENSG00000179051 | regulator of chromosome<br>condensation 2                                                    |                 |



|           |                 |                                                                                                          |       |
|-----------|-----------------|----------------------------------------------------------------------------------------------------------|-------|
|           |                 | [Source:HGNC<br>Symbol;Acc:HGNC:30297]                                                                   |       |
| RGL1_2    | ENSG00000143344 | ral guanine nucleotide<br>dissociation stimulator like 1<br>[Source:HGNC<br>Symbol;Acc:HGNC:30281]       |       |
| RHOJ_1    | ENSG00000116574 | ras homolog family member U<br>[Source:HGNC<br>Symbol;Acc:HGNC:17794]                                    |       |
| RNF168_1  | ENSG00000163961 | ring finger protein 168<br>[Source:HGNC<br>Symbol;Acc:HGNC:26661]                                        |       |
| RRAS2_1   | ENSG00000133818 | RAS related 2 [Source:HGNC<br>Symbol;Acc:HGNC:17271]                                                     |       |
| SCUBE3_1  | ENSG00000146197 | signal peptide, CUB domain<br>and EGF like domain<br>containing 3 [Source:HGNC<br>Symbol;Acc:HGNC:13655] |       |
| SET_2     | ENSG00000119335 | SET nuclear proto-oncogene<br>[Source:HGNC<br>Symbol;Acc:HGNC:10760]                                     |       |
| SLC29A1_9 | ENSG00000112759 | solute carrier family 29<br>member 1 (Augustine blood<br>group) [Source:HGNC<br>Symbol;Acc:HGNC:11003]   |       |
| SNRPN_10  | ENSG00000128739 | small nuclear<br>ribonucleoprotein polypeptide<br>N [Source:HGNC<br>Symbol;Acc:HGNC:11164]               | RNABP |

|           |                 |                                                                              |    |
|-----------|-----------------|------------------------------------------------------------------------------|----|
| THY1_1    | ENSG00000154096 | Thy-1 cell surface antigen<br>[Source:HGNC<br>Symbol;Acc:HGNC:11801]         |    |
| TRNP1_1   | ENSG00000253368 | TMF1 regulated nuclear<br>protein 1 [Source:HGNC<br>Symbol;Acc:HGNC:34348]   |    |
| TSC22D1_1 | ENSG00000102804 | TSC22 domain family<br>member 1 [Source:HGNC<br>Symbol;Acc:HGNC:16826]       | TF |
| TTC9_1    | ENSG00000133985 | tetratricopeptide repeat<br>domain 9 [Source:HGNC<br>Symbol;Acc:HGNC:20267]  |    |
| TLL12_1   | ENSG00000100304 | tubulin tyrosine ligase like 12<br>[Source:HGNC<br>Symbol;Acc:HGNC:28974]    |    |
| TUBA4A_1  | ENSG00000127824 | tubulin alpha 4a<br>[Source:HGNC<br>Symbol;Acc:HGNC:12407]                   |    |
| UCK2_1    | ENSG00000143179 | uridine-cytidine kinase 2<br>[Source:HGNC<br>Symbol;Acc:HGNC:12562]          |    |
| UGP2_25   | ENSG00000169764 | UDP-glucose<br>pyrophosphorylase 2<br>[Source:HGNC<br>Symbol;Acc:HGNC:12527] |    |
| USO1_1    | ENSG00000138768 | USO1 vesicle transport factor<br>[Source:HGNC<br>Symbol;Acc:HGNC:30904]      |    |
| USP44_1   | ENSG00000136014 | ubiquitin specific peptidase 44<br>[Source:HGNC<br>Symbol;Acc:HGNC:20064]    |    |

|           |                 |                                                                                            |       |
|-----------|-----------------|--------------------------------------------------------------------------------------------|-------|
| USP9X_1   | ENSG00000124486 | ubiquitin specific peptidase 9<br>X-linked [Source:HGNC<br>Symbol;Acc:HGNC:12632]          |       |
| VASH2_2   | ENSG00000143494 | vasohibin 2 [Source:HGNC<br>Symbol;Acc:HGNC:25723]                                         |       |
| VSIG10_1  | ENSG00000176834 | V-set and immunoglobulin<br>domain containing 10<br>[Source:HGNC<br>Symbol;Acc:HGNC:26078] |       |
| WDR12_1   | ENSG00000138442 | WD repeat domain 12<br>[Source:HGNC<br>Symbol;Acc:HGNC:14098]                              | RNABP |
| WLS_1     | ENSG00000116729 | Wnt ligand secretion mediator<br>[Source:HGNC<br>Symbol;Acc:HGNC:30238]                    |       |
| ZDHHC22_1 | ENSG00000177108 | zinc finger DHHC-type<br>palmitoyltransferase 22<br>[Source:HGNC<br>Symbol;Acc:HGNC:20106] |       |
| ZFP42_1   | ENSG00000179059 | ZFP42 zinc finger protein<br>[Source:HGNC<br>Symbol;Acc:HGNC:30949]                        | TF    |
| ZNF436_2  | ENSG00000125945 | zinc finger protein 436<br>[Source:HGNC<br>Symbol;Acc:HGNC:20814]                          | TF    |
| ZNF503_1  | ENSG00000165655 | zinc finger protein 503<br>[Source:HGNC<br>Symbol;Acc:HGNC:23589]                          | TF    |
| ZNF703_1  | ENSG00000183779 | zinc finger protein 703<br>[Source:HGNC<br>Symbol;Acc:HGNC:25883]                          | TF    |

|          |                 |                                                                   |    |
|----------|-----------------|-------------------------------------------------------------------|----|
| ZNF770_1 | ENSG00000198146 | zinc finger protein 770<br>[Source:HGNC<br>Symbol;Acc:HGNC:26061] | TF |
|----------|-----------------|-------------------------------------------------------------------|----|

**Table S2: Transcripts up- or downregulated in all SRA-Data analyses**

Listed the names of the transcripts which are up- or down-regulated in the same manner as the NOS2-2 transcript in all SRA data analyzed (PRJNA565303, PRJNA565303, CNP0000771, PRJDB1099\_Down, PRJDB1099\_WT, PRJNA244622, PRJNA338181\_C15, PRJNA338181\_H9, PRJNA674506, PRJNA59633). Shown are the names of the transcripts, the ENSEMBL-ID of the genes, a short description, and a comment indicating if the gene is known to be a transcription factor (**TF**; [2]) or RNA binding protein (**RNABP**; [3]).

## Supplemental Figures

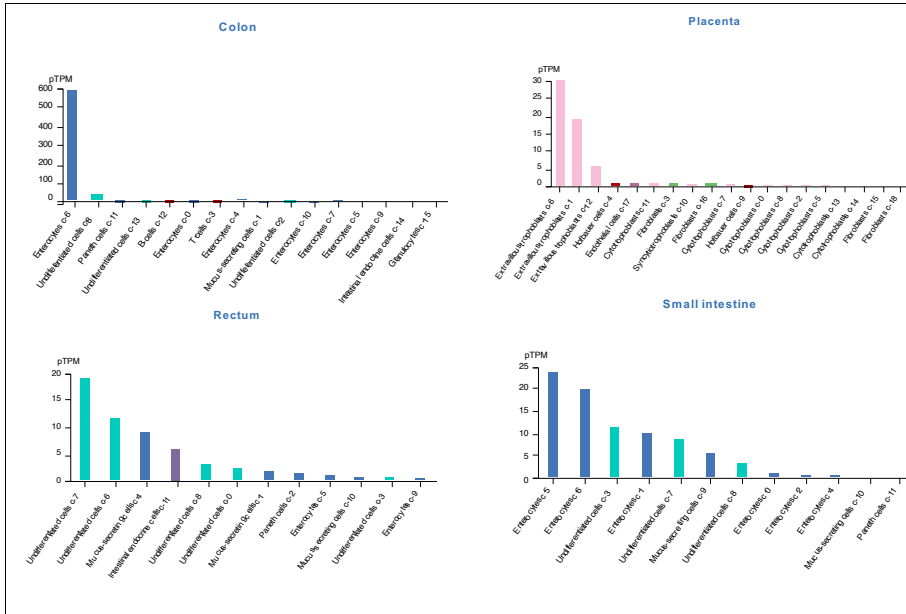

Figure S1: NOS2 mRNA isoform expression in different human tissues and cell types (copied from <https://www.proteinatlas.org/ENSG00000007171-NOS2/celltype>)

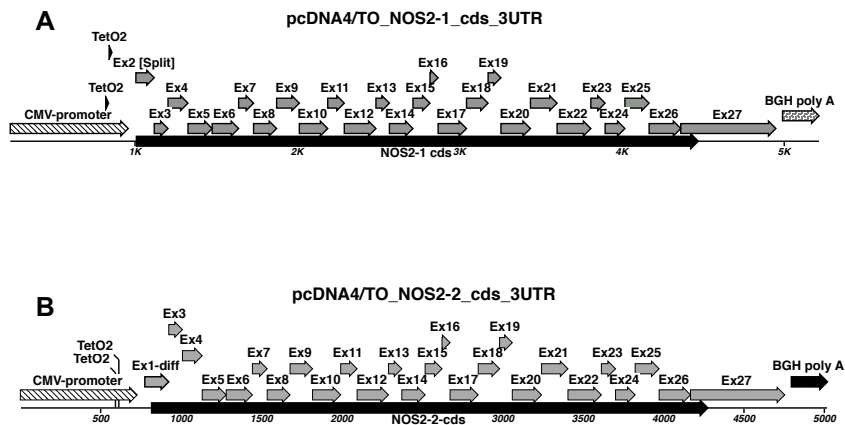

Figure S2: Scheme of the pcDNA4/TO constructs containing the NOS2-1\_cds\_3UTR or the NOS2-2\_cds\_3UTR used in transient transfection analyses.

**A:** pcDNA4/TO\_NOS2-1\_cds\_3UTR: The exon sequences used, and the coding sequence (**cds**) is shown. Also, the cytomegalo-virus (**CMV**)-promoter and the bovine growth hormone (**BGH**) polyA signal important for expression are indicated. In addition, the binding sites of the tetracycline repressor (**TetO**) are shown. This TetO sites are important for the inhibition of the CMV-promoter in cells expressing the tetracycline repressor.

**B:** pcDNA4/TO\_NOS2-2\_cds\_3UTR: Same as A, but the replacement of exon 2 by exon1-diff is indicated.

## UCSC Genome Browser on Human Dec. 2013 (GRCh38/hg38) Assembly

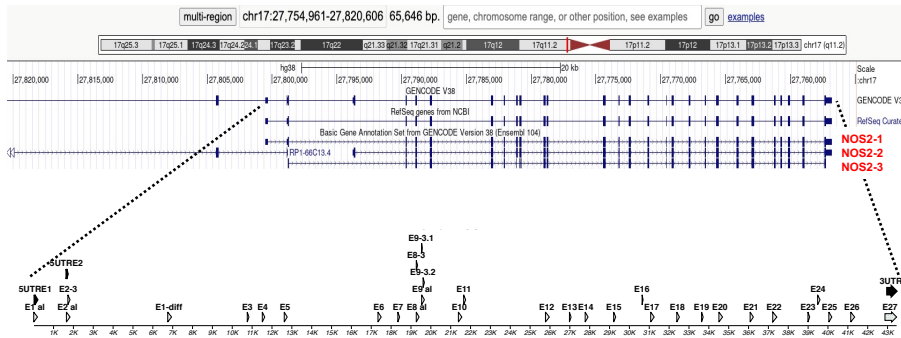

Figure S3: Scheme of the human NOS2 gene as presented in the UCSC genome browser.

In the upper part a copy of the scheme of the human NOS2 gene as presented by the UCSC genome browser (on human December 2013 – GRCh38/hg38 – assembly) is shown (GENCODE V38 and RefSeq genes from NCBI). In the 5'-upstream sequence of the NOS2 gene a part of the RPI-66C13.4 gene is shown. Also, the three NOS2 mRNA isoforms (NOS2-1, -2, -3) encoded by the NOS2 gene are presented. The human NOS 2 gene is located on the human chromosome 17 (27756766-27800529 on the opposite strand).

In the lower part a scheme of the human NOS2 gene with important [sequence](#) features is presented. Shown are the exons (E1 to E27). Exon differently used in the three transcripts are signed by **al**. The additional exon **E1-diff** used in the NOS2-2 mRNA is indicated. The 5'-UTR (**5UTR**) of the NOS2-1 mRNA is encoded by E1 and partly by E2. The 3'-UTR (**3UTR**) is encoded by Ex27. In the NOS2-3 mRNA a shortened Ex27 (**Ex27-3**) sequence is found. In the NOS2-3 mRNA exons 8 and 9 are replaced by the exons E8-2, E9-3.1 and E9-3.2.

hat gelöscht: sequence

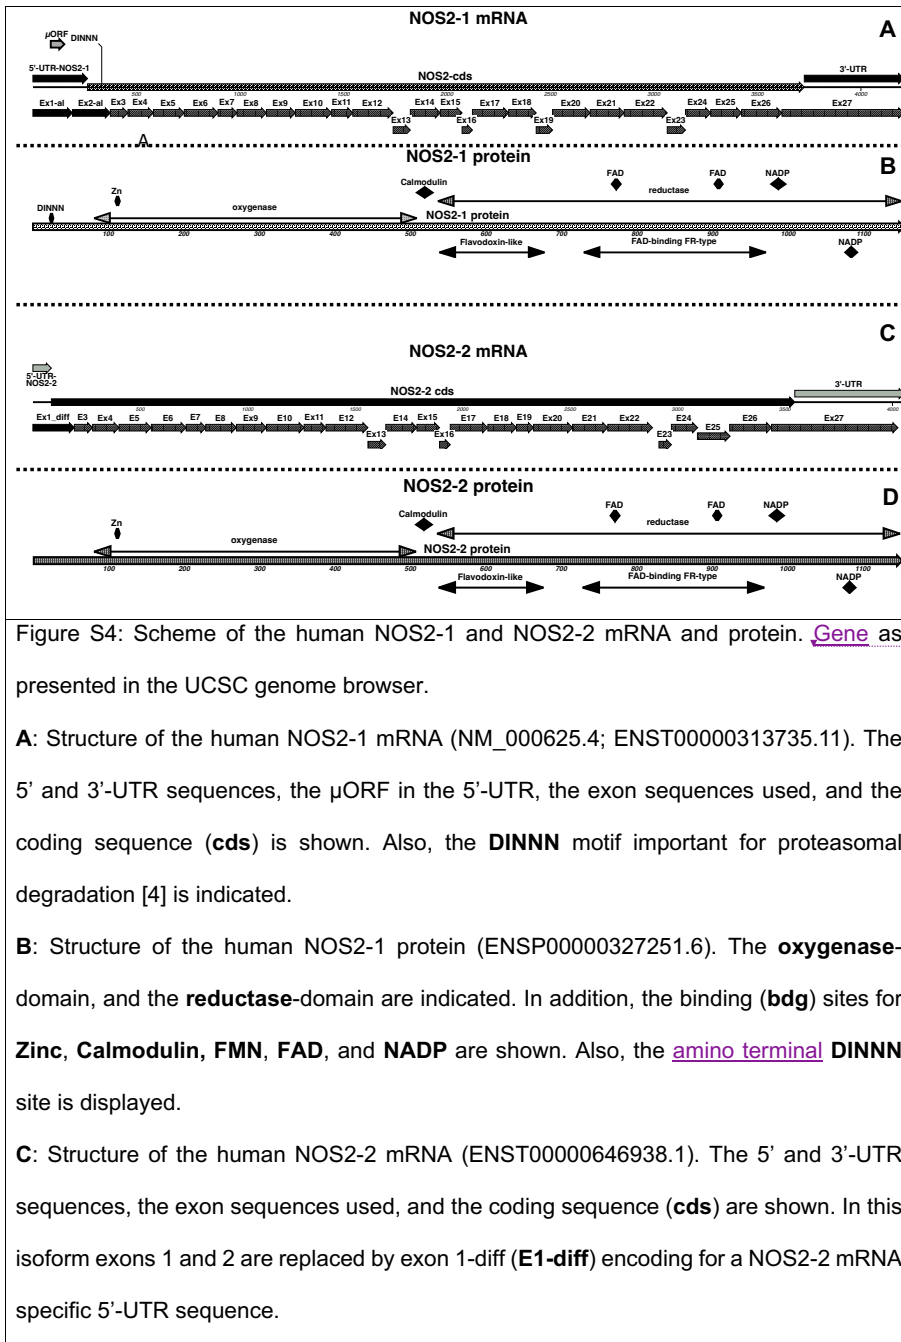

Figure S4: Scheme of the human NOS2-1 and NOS2-2 mRNA and protein. [Gene](#) as presented in the UCSC genome browser.

hat gelöscht: gene

**A:** Structure of the human NOS2-1 mRNA (NM\_000625.4; ENST00000313735.11). The 5' and 3'-UTR sequences, the μORF in the 5'-UTR, the exon sequences used, and the coding sequence (**cds**) is shown. Also, the **DINNN** motif important for proteasomal degradation [4] is indicated.

**B:** Structure of the human NOS2-1 protein (ENSP00000327251.6). The **oxygenase**-domain, and the **reductase**-domain are indicated. In addition, the binding (**bdg**) sites for **Zinc**, **Calmodulin**, **FMN**, **FAD**, and **NADP** are shown. Also, the **amino terminal** **DINNN** site is displayed.

**C:** Structure of the human NOS2-2 mRNA (ENST00000646938.1). The 5' and 3'-UTR sequences, the exon sequences used, and the coding sequence (**cds**) are shown. In this isoform exons 1 and 2 are replaced by exon 1-diff (**E1-diff**) encoding for a NOS2-2 mRNA specific 5'-UTR sequence.



**D:** Structure of the human NOS2-2 protein (ENSP00000494870.1). The NOS2-2 protein has the nearly the same structure as the NOS2-1 protein. However, as the amino terminal end of the protein is different the DINNN-motif is missing.

hat gelöscht: aminoterminal

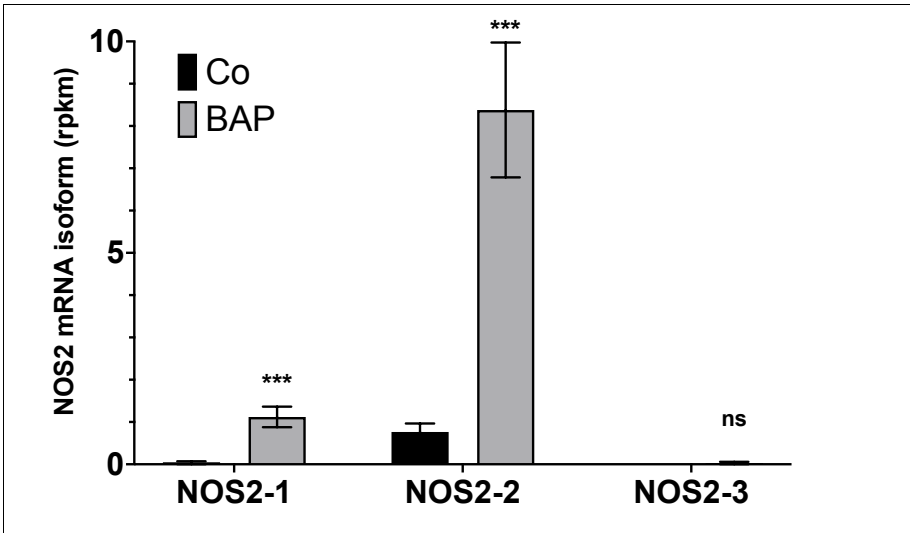

Figure S5: NOS2 mRNA isoform expression in human H1-ESC induced to differentiate to syncytiotrophoblast cells.

RNA-Seq data (Bioproject PRJNA294733, [5, 6]) were analyzed for human NOS2 mRNA isoform expression. Shown are the mean  $\pm$  sem of the rpkm values of NOS2 mRNA isoforms treated with (**BAP**) or without (**co**) treatment of the cells with bone morphogenetic protein-4 (BMP-4), BMP4/A83-01 (activin A signaling inhibitor) and PD173074 (FGF2 signaling inhibitor; BAP treatment). \*\*\* FDR p-value < 0.001 vs untreated ESC.

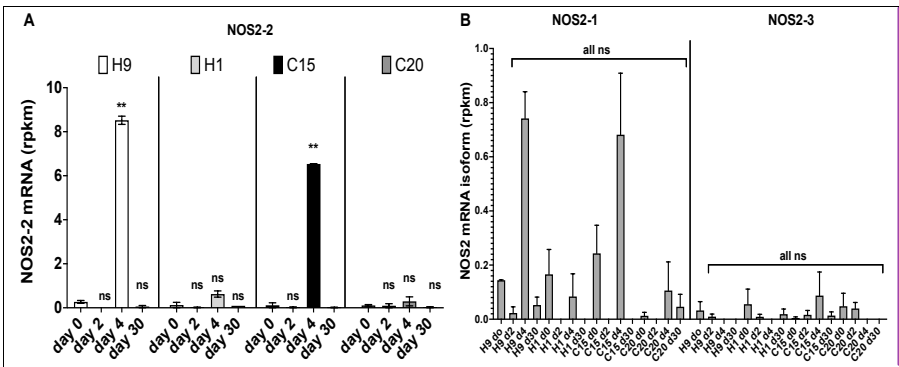

Kommentiert [PA1]: x-Achsenbeschriftung ist schlecht zu lesen

Figure S6: NOS2-2 mRNA expression in two different human ESC lines (H1, H9) and two different iPSC (C15, C20) lines induced to differentiate to cardiomyocytes.

RNA-Seq data (Bioproject PRJNA338181 [7]) were analyzed for human NOS2 mRNA isoform expression (**A**: NOS2-2; **B**: NOS2-1 and NOS2-3). Shown are the mean  $\pm$  SEM of the rpkm values of NOS2 mRNA isoforms at different time points (day 0 to day 30). \*\* FDR p-value  $< 0.01$ ; ns FDR-value  $> 0,05$  vs day 0.

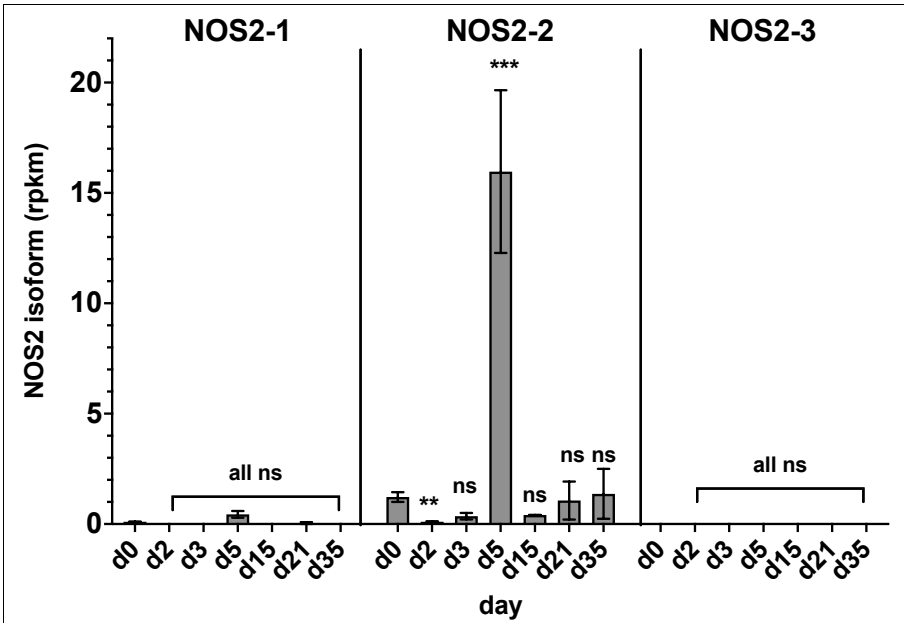

Figure S7: NOS2 mRNA isoform expression in human CD34-iPSC induced to differentiate to cardiomyocytes.

RNA-Seq data (Bioproject PRJNA674506 [8]) were analyzed for human NOS2 mRNA isoform expression. Shown are the mean  $\pm$  sem of the rpkm values of NOS2 mRNA isoforms at different time points (day 0 to day 35). \*\*\* FDR-value  $< 0.001$ , \*\* FDR-value  $< 0.01$ , ns FDR-value  $> 0.05$  vs day 0.

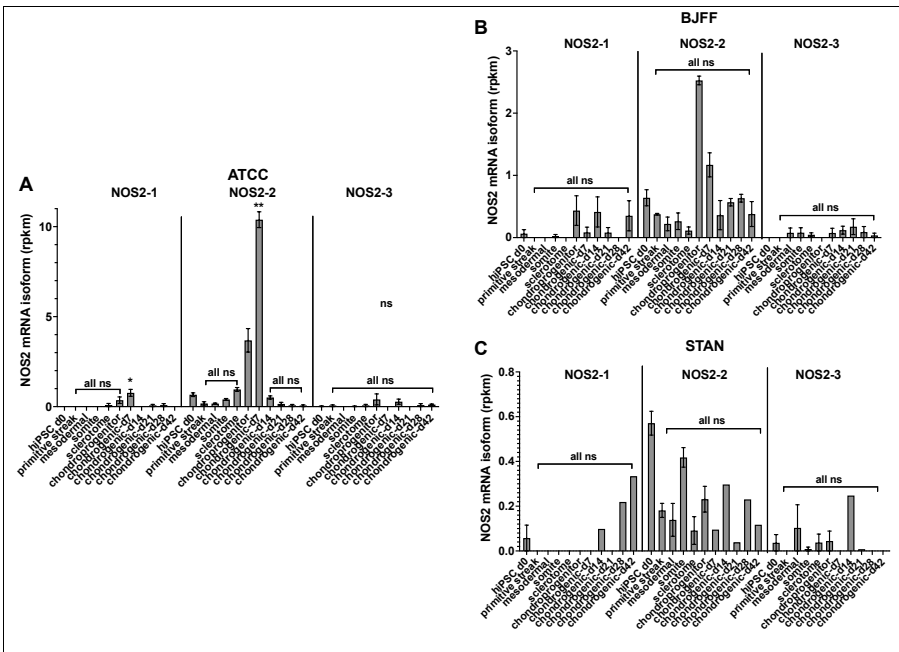

Figure S8: NOS2 mRNA isoform expression in different human iPSC lines (ATCC, BJFF, STAN) induced to differentiate to chondrocytes.

RNA-Seq data (Bioproject PRJNA674506 [9]) were analyzed for human NOS2 mRNA isoform expression. Shown are the mean  $\pm$  SEM of the rpkm values of the NOS2 mRNA isoforms at different differentiation stages (untreated **hiPSC d0**, primitive **streak**, **mesoderm**, **somite**, **sclerotome**, chondroprogenitor – **CP** -, and chondrogenic – **CG** - from d7 to day 42). \*\* FDR p-value < 0.01, ns FDR-value > 0.05 vs day 0.

hat gelöscht: .

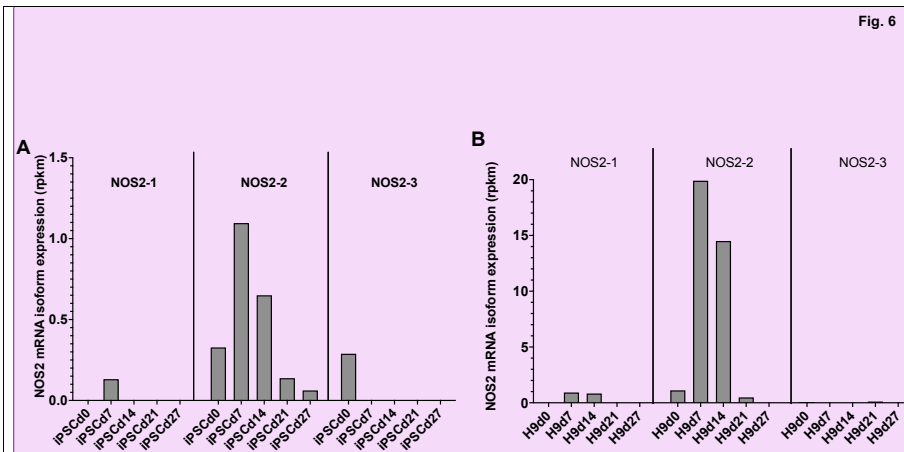

Kommentiert [PA2]: x-Achsenbeschriftung bei B schwierig zu lesen

Figure S9: NOS2 mRNA isoform expression in human H9-ESC or iPSC induced to differentiate to mesenchymal stromal cells.

RNA-Seq data (CNP0000771 [10]) were analyzed for human NOS2 mRNA isoform expression. Shown are rpkm values (single experiments) of the NOS2 mRNA isoforms at different time points (day 0 to day 27).

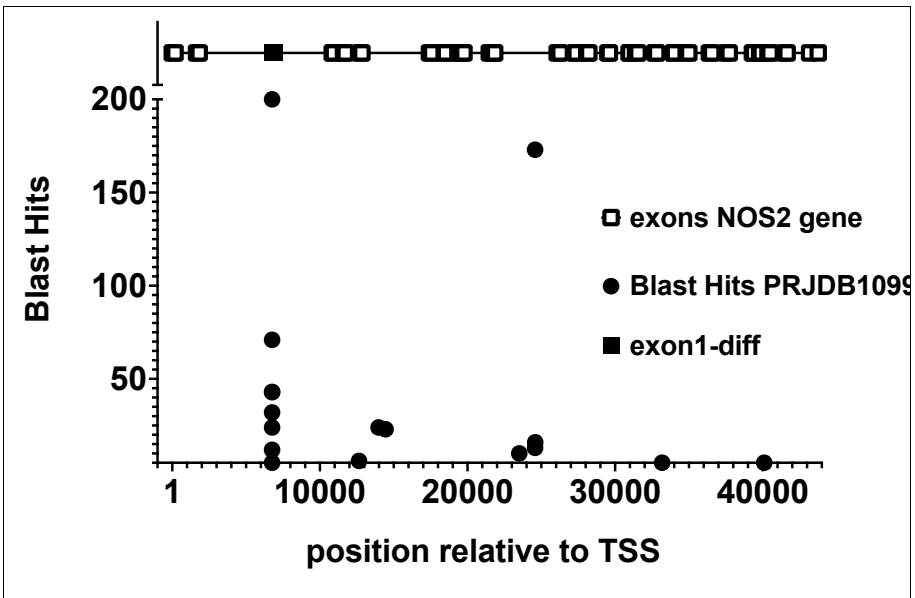

Figure S10: Blast hits of the sequence reads from PRJB1099 on the human NOS2 gene. RNA-Seq data (Bioproject PRJB1099 [11]) were aligned to the human NOS2 gene. Shown are the number of blast hits and the position of the exons of the human NOS2 gene relative to the transcription start site (TSS) of the humane NOS2 gene.

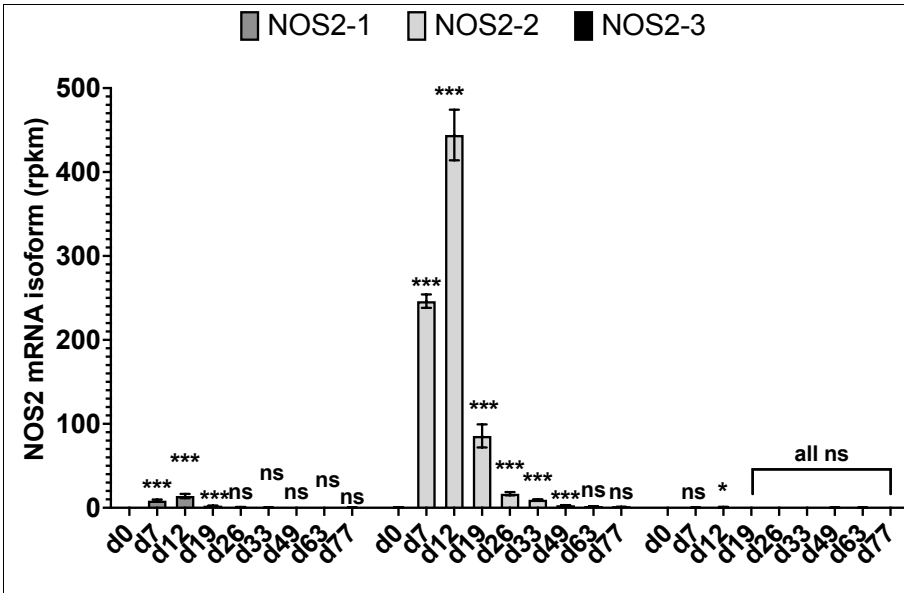

Figure S11: NOS2 mRNA isoform expression in human H9 ESC induced to differentiate to neurons.

RNA-Seq data (Bioproject PRJNA244622 [12]) were analyzed for human NOS2 mRNA isoform expression. Shown are the mean  $\pm$  sem of the rpkm values of NOS2 mRNA isoform at different time points (day 0 to day 77). \*\*\* FDR p-value < 0.001, \* FDR-value < 0.05, ns FDR-value > 0.05 vs day 0.

hat gelöscht: S

hat gelöscht:



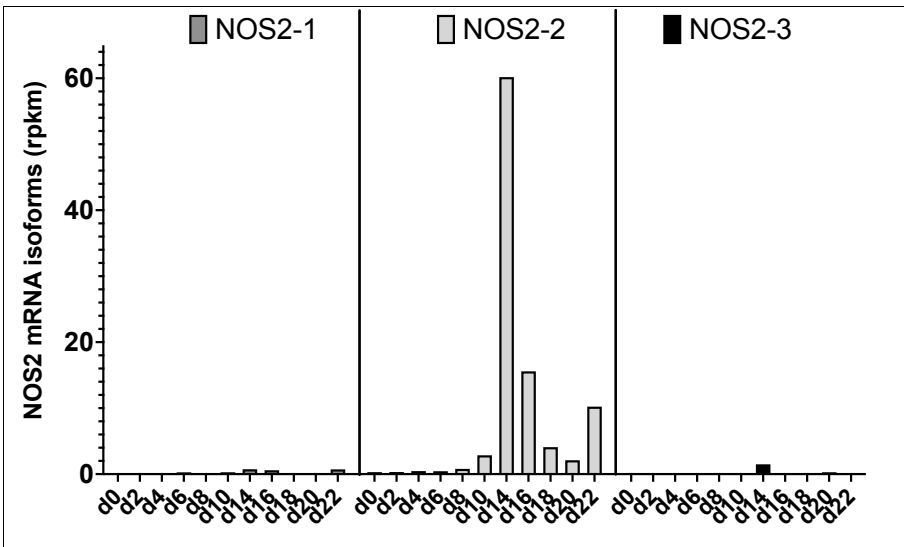

Figure S12: NOS2 mRNA isoform expression in H9-ESC induced to differentiate to neurons.

RNA-Seq data (Bioproject PRJNA404971, [7]) were analyzed for human NOS2 mRNA isoform expression. Shown are the single rpkm values of NOSS2 mRNA isoforms at different time points (day 0 to day 22).

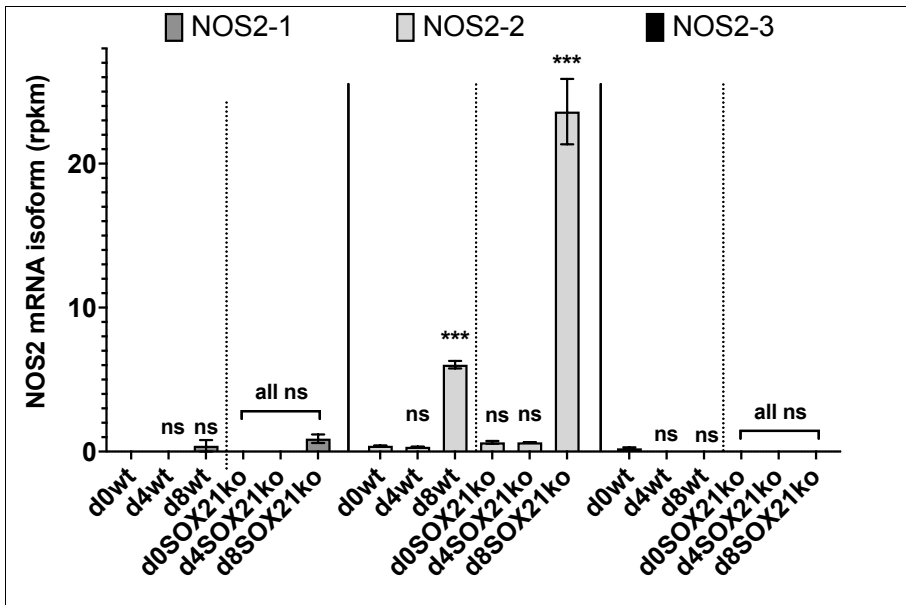

Figure S13: NOS2 mRNA isoform expression in human wildtype H9-ESC (**wt**) or H9-ESC stably transfected with an anti-SOX21 siRNA (**SOX21ko**) induced to differentiate to neurons.

RNA-Seq data (Bioproject PRJNA433877, [13]) were analyzed for human NOS2 mRNA isoform expression. Shown are the mean  $\pm$  sem of the rpkm values of NOS2 mRNA isoforms at different time points (day 0 to day 21). \*\*\* FDR p-value < 0.001, ns FDR value > 0,05 vs day 0 wt.

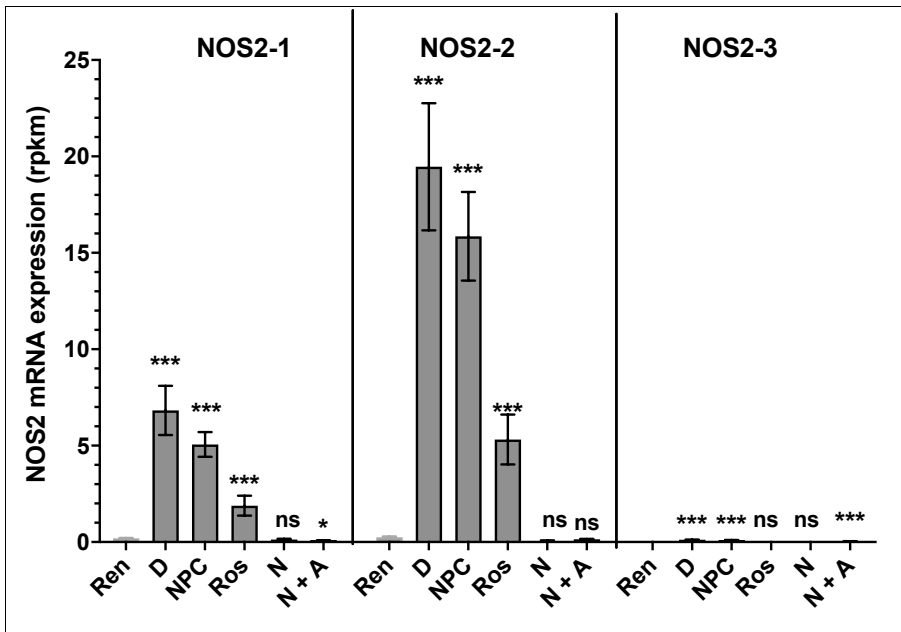

Figure S14: NOS2 mRNA isoform expression in human iPSC induced to differentiate to neurons.

RNA-Seq data (Bioproject PRJNA596331) were analyzed for human NOS2 mRNA isoform expression. Shown are the mean  $\pm$  sem of the rpkm values of NOS2 mRNA isoforms at different differentiation stages (Ren = renew, D = dorsal, NPS = neuronal progenitor cells, Ros = rosette, N = neurons, N+A = neurons plus astrocytes). \*\*\* FDR p-value < 0.001, \* FDR-Value < 0.05, ns FDR value > 0,05 vs Ren.

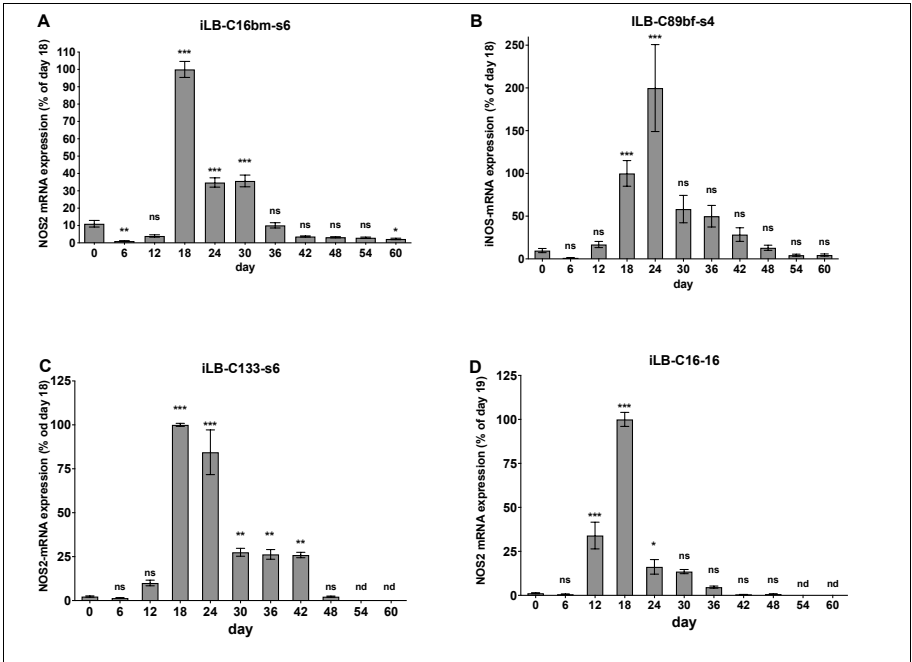

Figure S15: NOS2 mRNA expression in human iPSC induced to differentiate to neurons. Four different human iPSCs lines were generated from PBMC of three different donors [14]. RNA was isolated from these 4 different human iPSC lines induced to differentiate to neurons [15] at different time points (**day 0 to 60**). NOS2-mRNA and 18S rRNA expression was analyzed using the qRT-PCR method. NOS2 mRNA expression was normalized to the 18S rRNA expression. The relative NOS2 mRNA expression in the cells treated for 18 days was set to 100%. Shown are the individual summaries of the analysis of the four different iPSC cell lines. The values represent the mean  $\pm$  SEM of  $n=3$  different isolated RNAs for each time point. (\*\*\*  $p < 0.001$ , \*\*  $p < 0,01$ , \*  $p < 0.05$ , ns not significant vs. iPSC treated for zero days; 1-way Anova with Bonferroni's multiple comparisons test).

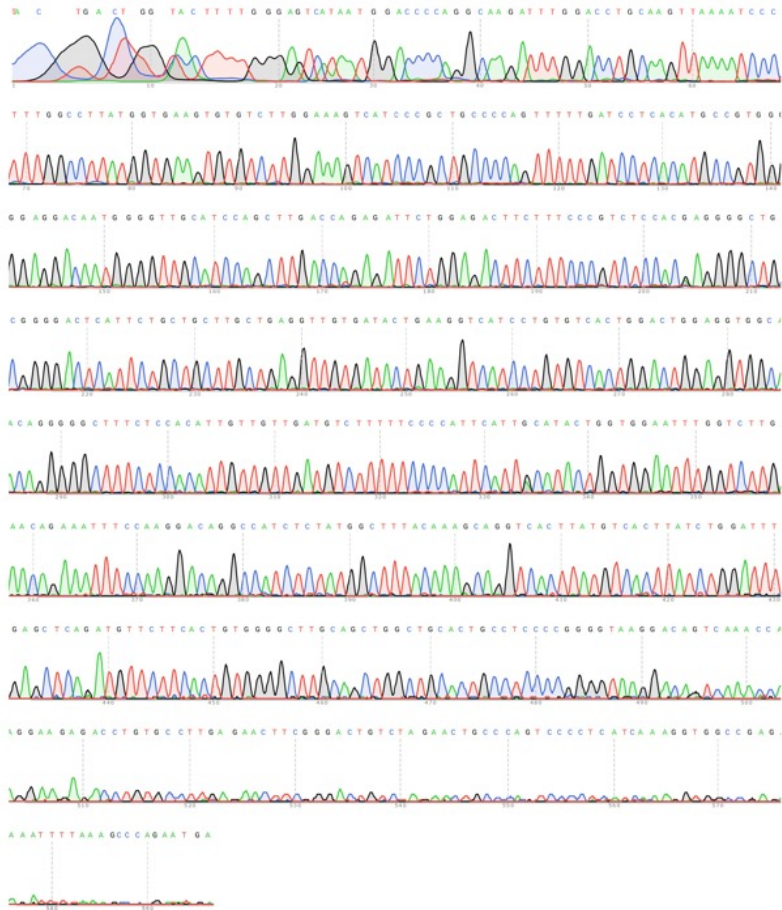

**A**

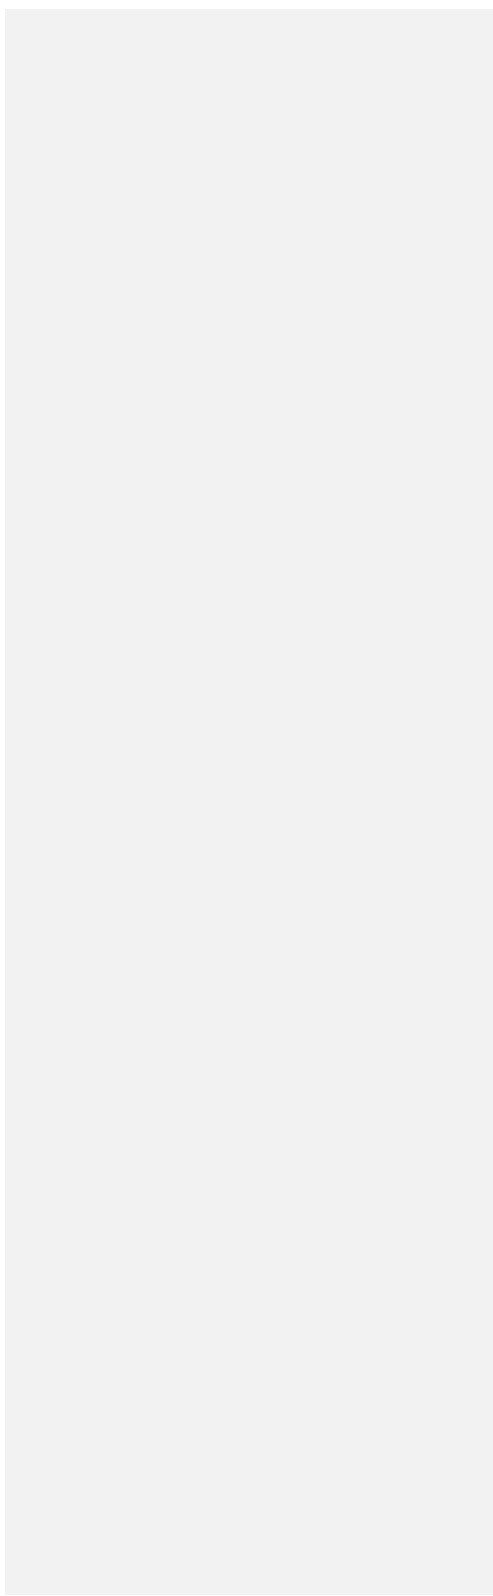

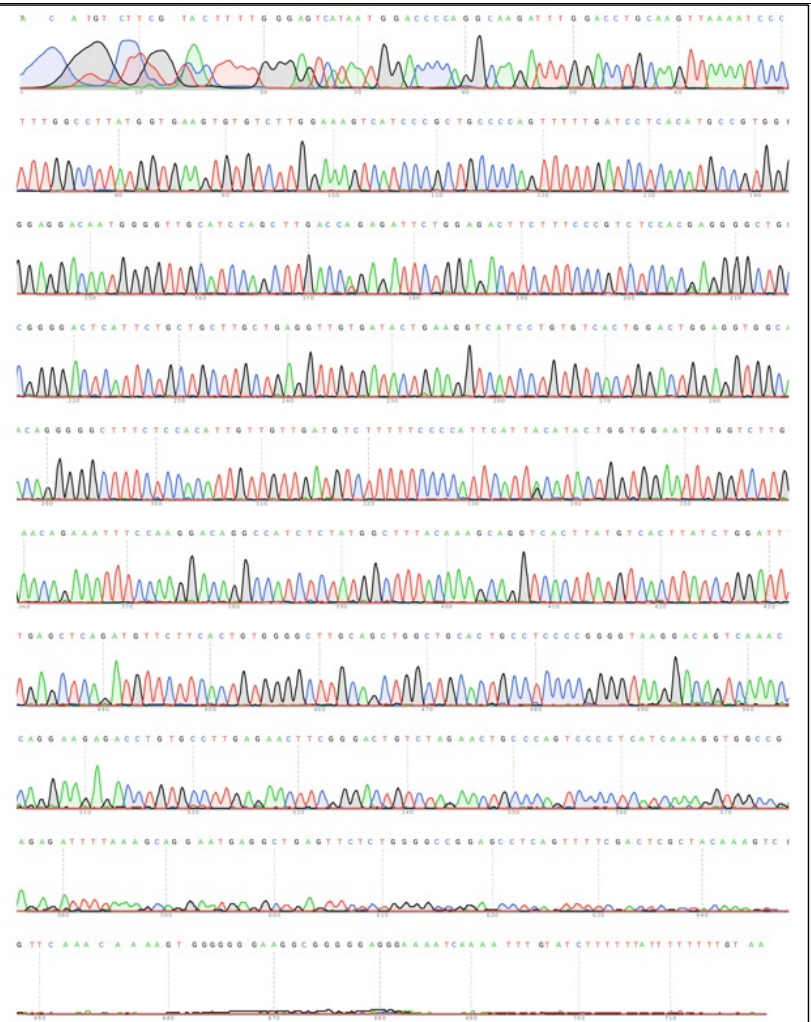

**B**



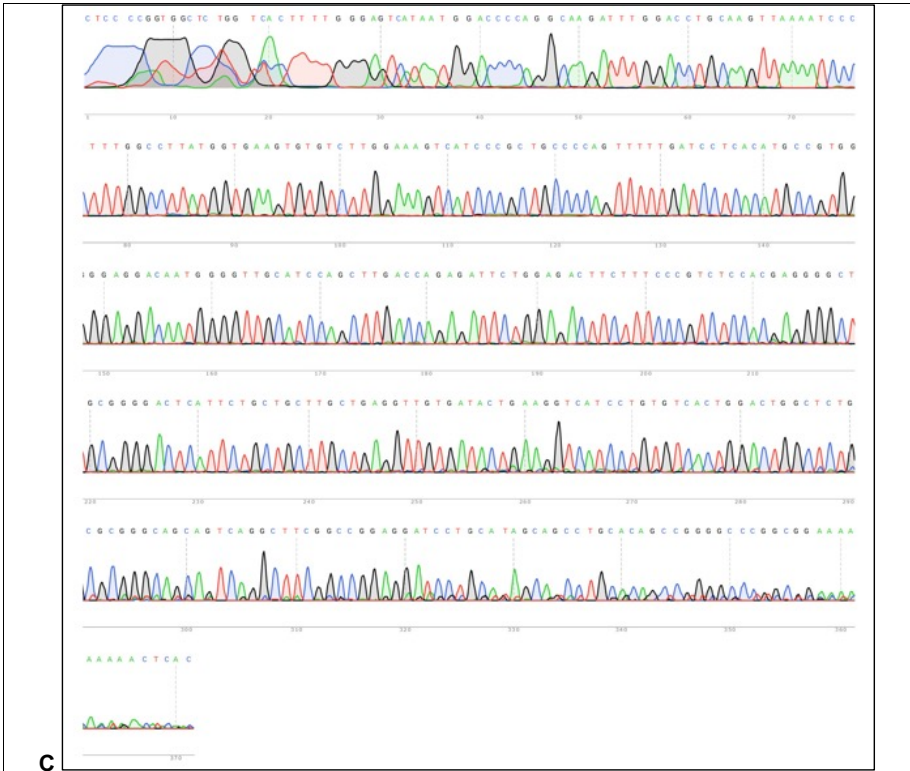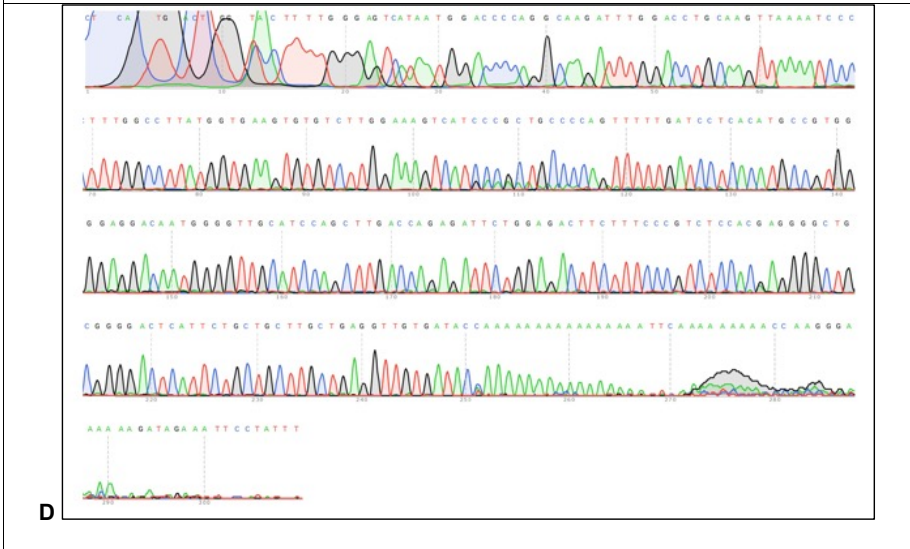





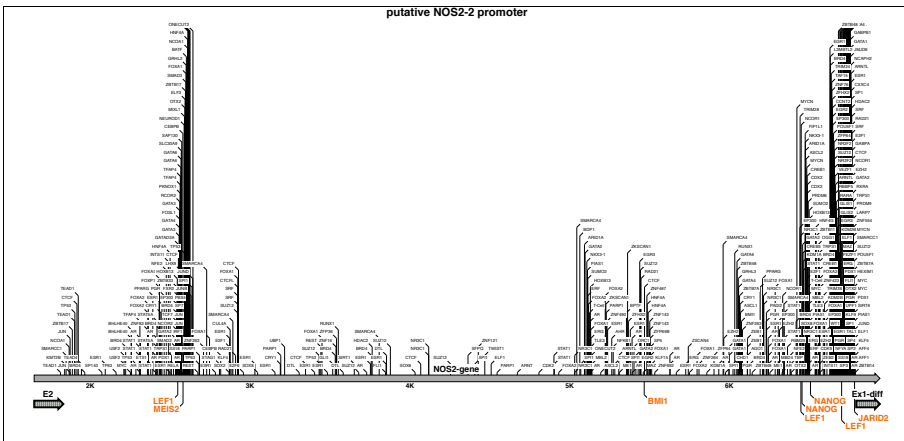

Figure S17: Scheme of the putative alternative promoter used for the expression of the NOS2-2 mRNA.

Shown are the transcription factor binding sites (TF-bdg) to the genomic DNA sequence between exon 2 and exon 1-diff of the human NOS2 gene. All TF-bdg shown (see supplementary table S1 for description) are identified by ChIP analyses [1]. Indicated are the exon 2 and exon 1-diff sequences. The highlighted TF-bdg (BMI1, JALEF1, MEIS2, NANOG) are transcription factors showing enhanced expression in all expression data analyzed (see supplemental table S2)

### Supplemental References

1. Kolpakov F, Akberdin I, Kashapov T, Kiselev L, Kolmykov S, Kondrakhin Y, Kutumova E, Mandrik N, Pintus S, Ryabova A, et al: **BioUML: an integrated environment for systems biology and collaborative analysis of biomedical data.** *Nucleic Acids Res* 2019, **47**:W225-W233.
2. Vaquerizas JM, Kummerfeld SK, Teichmann SA, Luscombe NM: **A census of human transcription factors: function, expression and evolution.** *Nat Rev Genet* 2009, **10**:252-263.
3. Gerstberger S, Hafner M, Tuschl T: **A census of human RNA-binding proteins.** *Nat Rev Genet* 2014, **15**:829-845.
4. Foster MW, Thompson JW, Forrester MT, Sha Y, McMahon TJ, Bowles DE, Moseley MA, Marshall HE: **Proteomic analysis of the NOS2 interactome in human airway epithelial cells.** *Nitric Oxide* 2013, **34**:37-46.
5. Schust DJ, Bonney EA, Sugimoto J, Ezashi T, Roberts RM, Choi S, Zhou J: **The Immunology of Syncytialized Trophoblast.** *Int J Mol Sci* 2021, **22**.
6. Yabe S, Alexenko AP, Amita M, Yang Y, Schust DJ, Sadovsky Y, Ezashi T, Roberts RM: **Comparison of syncytiotrophoblast generated from human embryonic stem cells and from term placentas.** *Proc Natl Acad Sci U S A* 2016, **113**:E2598-2607.
7. Liu Q, Jiang C, Xu J, Zhao MT, Van Bortle K, Cheng X, Wang G, Chang HY, Wu JC, Snyder MP: **Genome-Wide Temporal Profiling of Transcriptome and Open Chromatin of Early Cardiomyocyte Differentiation Derived From hiPSCs and hESCs.** *Circ Res* 2017, **121**:376-391.
8. Zhang F, Qiu H, Dong X, Wang C, Na J, Zhou J, Wang C: **Transferrin improved the generation of cardiomyocyte from human pluripotent stem cells for myocardial infarction repair.** *J Mol Histol* 2021, **52**:87-99.

9. Wu CL, Dicks A, Steward N, Tang R, Katz DB, Choi YR, Guilak F: **Single cell transcriptomic analysis of human pluripotent stem cell chondrogenesis.** *Nat Commun* 2021, **12**:362.
10. Luo L, Zhou Y, Zhang C, Huang J, Du J, Liao J, Bergholt NL, Bunger C, Xu F, Lin L, et al: **Feeder-free generation and transcriptome characterization of functional mesenchymal stromal cells from human pluripotent stem cells.** *Stem Cell Res* 2020, **48**:101990.
11. Hon CC, Ramilowski JA, Harshbarger J, Bertin N, Rackham OJ, Gough J, Denisenko E, Schmeier S, Poulsen TM, Severin J, et al: **An atlas of human long non-coding RNAs with accurate 5' ends.** *Nature* 2017, **543**:199-204.
12. van de Leemput J, Boles NC, Kiehl TR, Corneo B, Lederman P, Menon V, Lee C, Martinez RA, Levi BP, Thompson CL, et al: **CORTECON: a temporal transcriptome analysis of in vitro human cerebral cortex development from human embryonic stem cells.** *Neuron* 2014, **83**:51-68.
13. Fang Z, Liu X, Wen J, Tang F, Zhou Y, Jing N, Jin Y: **SOX21 Ensures Rostral Forebrain Identity by Suppression of WNT8B during Neural Regionalization of Human Embryonic Stem Cells.** *Stem Cell Reports* 2019, **13**:1038-1052.
14. Peitz M, Bechler T, Thiele CC, Veltel M, Bloschies M, Fliessbach K, Ramirez A, Brustle O: **Blood-derived integration-free iPS cell line UKBi011-A from a diagnosed male Alzheimer's disease patient with APOE varepsilon4/varepsilon4 genotype.** *Stem Cell Res* 2018, **29**:250-253.
15. Rehbach K, Kesavan J, Hauser S, Ritzenhofen S, Jungverdorben J, Schule R, Schols L, Peitz M, Brustle O: **Multiparametric rapid screening of neuronal process pathology for drug target identification in HSP patient-specific neurons.** *Sci Rep* 2019, **9**:9615.
